# Supplementary material for: Identification of AdipoRon analogues as novel activators of AMPK for the treatment of type 2 diabetes
Source: Royal Society of Chemistry journal article supplement (doi:10.1039/d3md00727h), 2024-01-01
Supplement: d3md00727h1.pdf [file d3md00727h1.pdf]

**Identification of AdipoRon analogues as novel activators of AMPK  
for the treatment of type 2 diabetes**

Chao Lin<sup>c</sup>, Geng Sun<sup>b,\*</sup> and Yi Li<sup>a,\*</sup>

*<sup>a</sup>Yantai Vocational College, Yantai 264000, Shandong, China*

*<sup>b</sup>School of Anesthesiology, Naval Medical University, 168 Changhai Road,  
Shanghai, 200433, China*

*<sup>c</sup>Yantai Institute of Materia Medica, Shandong 264000, China*

\*Corresponding Author E-mail: [sungengsg@163.com](mailto:sungengsg@163.com); [jiayouliyi@163.com](mailto:jiayouliyi@163.com)

# $^1\text{H}$ NMR and $^{13}\text{C}$ NMR of final compounds X-1

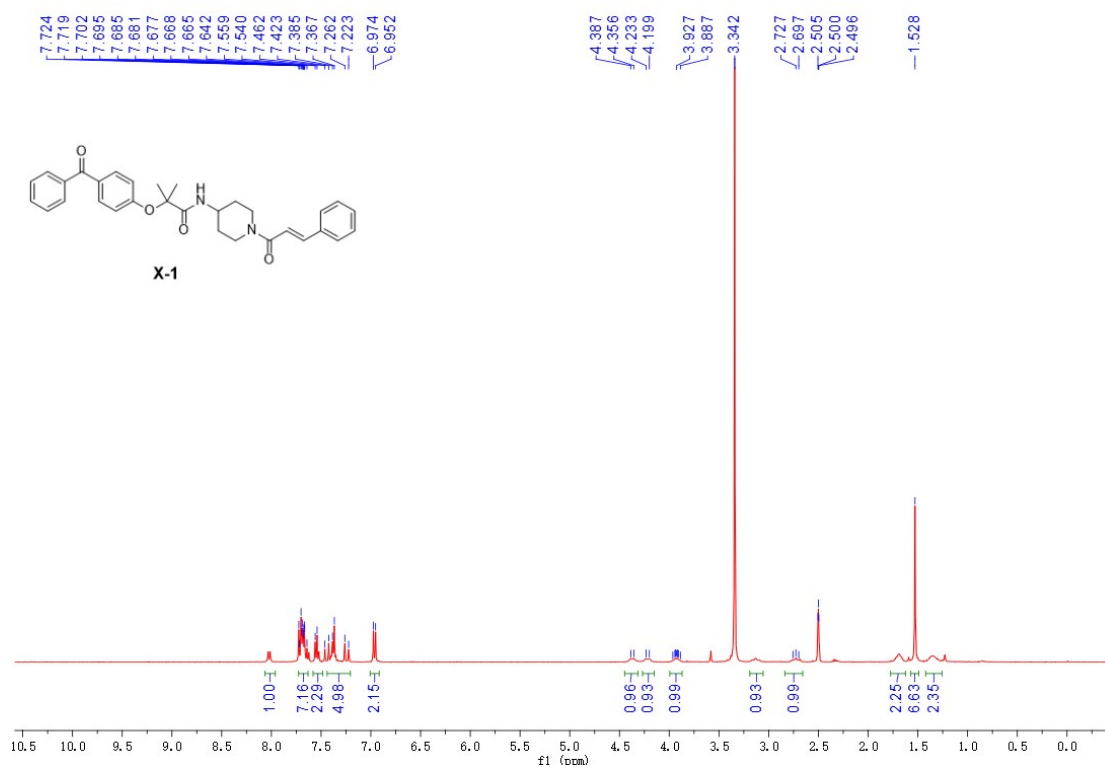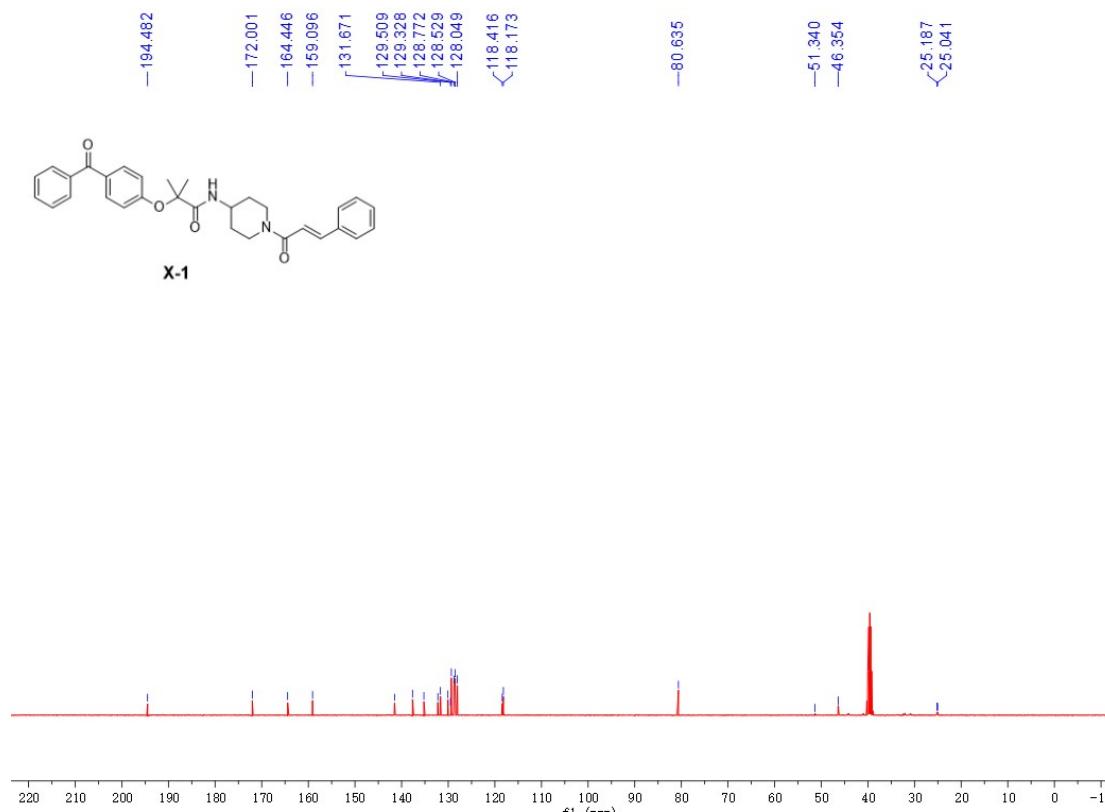

## HPLC purity traces for final compounds X-1

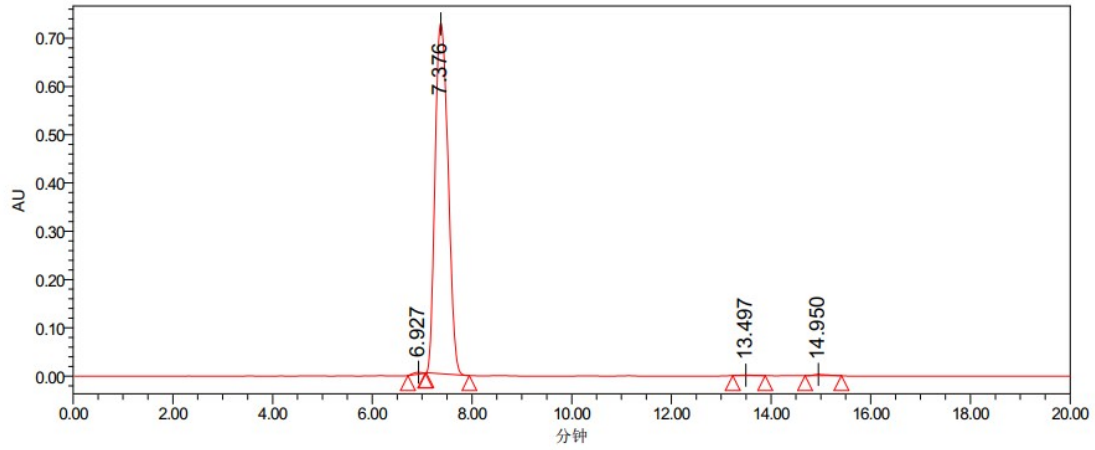

— 样品名称 XQ-1; 样品瓶 61; 进样 1; 通道 W2489 ChA; 采集日期 2022/7/5 12:16:09 CST

处理通道: W2489 ChA 254nm

|   | 处理通道            | 保留时间 (分钟) | 面积       | % 面积  | 峰高     |
|---|-----------------|-----------|----------|-------|--------|
| 1 | W2489 ChA 254nm | 6.927     | 48624    | 0.37  | 3949   |
| 2 | W2489 ChA 254nm | 7.376     | 13126232 | 99.02 | 726012 |
| 3 | W2489 ChA 254nm | 13.497    | 25728    | 0.19  | 1043   |
| 4 | W2489 ChA 254nm | 14.950    | 55503    | 0.42  | 2734   |

## $^1\text{H}$ NMR and $^{13}\text{C}$ NMR of final compounds X-2

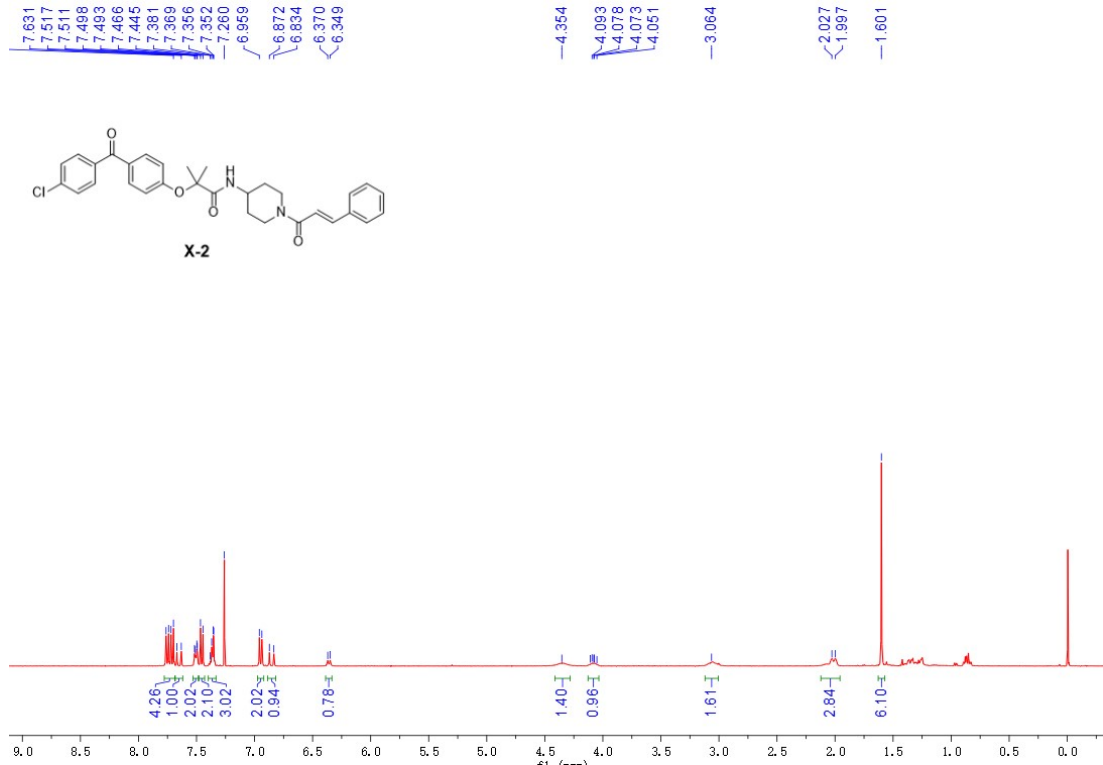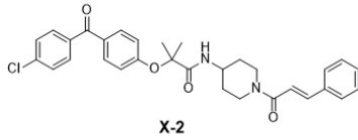

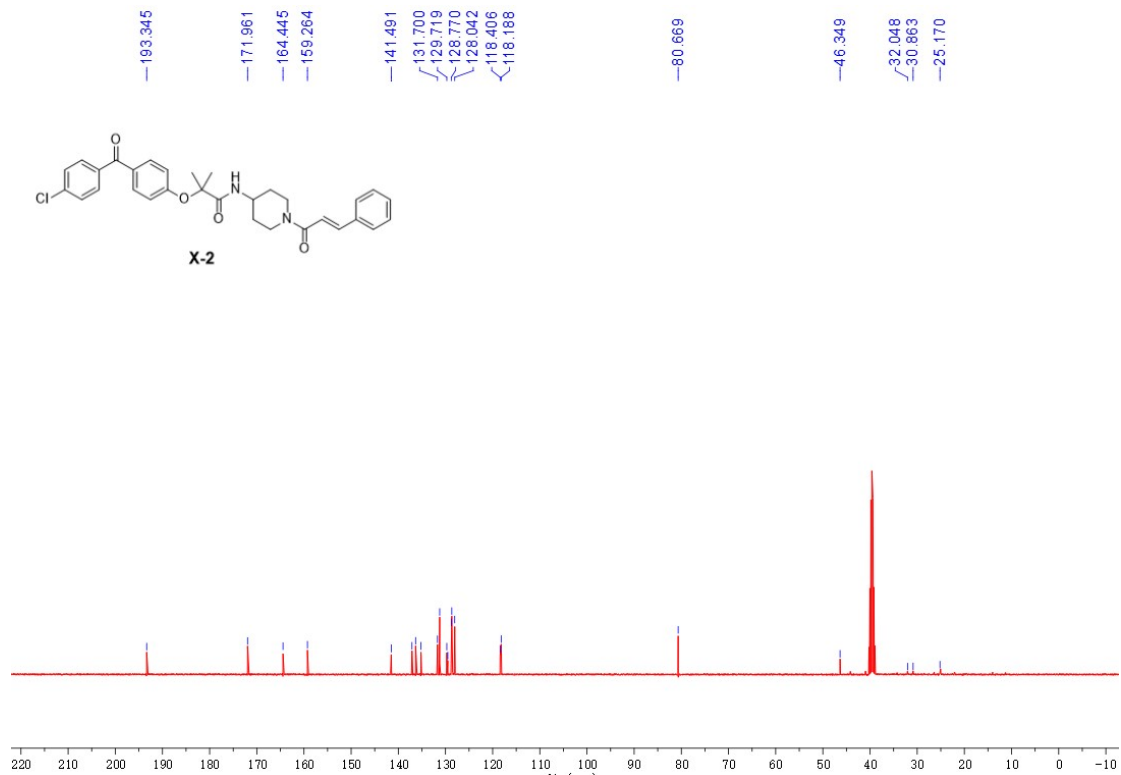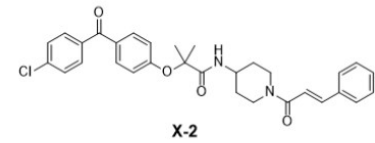

HPLC purity traces for final compounds X-2

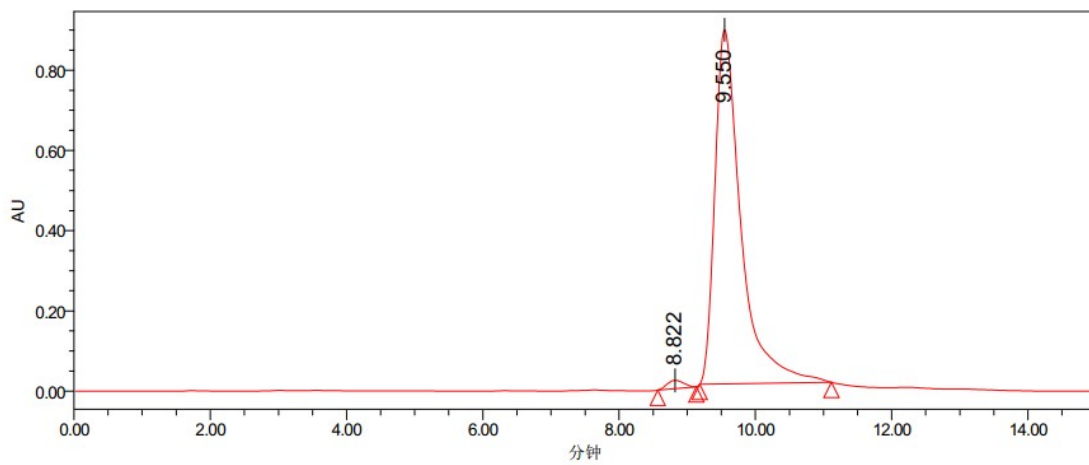

— 样品名称 27866-1; 样品瓶 51; 进样 1; 通道 W2489 ChA; 采集日期 2019/12/26 9:10:30 CST

处理通道: W2489 ChA 254nm

|   | 处理通道            | 保留时间<br>(分钟) | 面积       | % 面积  | 峰高     |
|---|-----------------|--------------|----------|-------|--------|
| 1 | W2489 ChA 254nm | 8.822        | 349797   | 1.47  | 20777  |
| 2 | W2489 ChA 254nm | 9.550        | 23526884 | 98.53 | 882968 |

# <sup>1</sup>H NMR and <sup>13</sup>C NMR of final compounds X-3

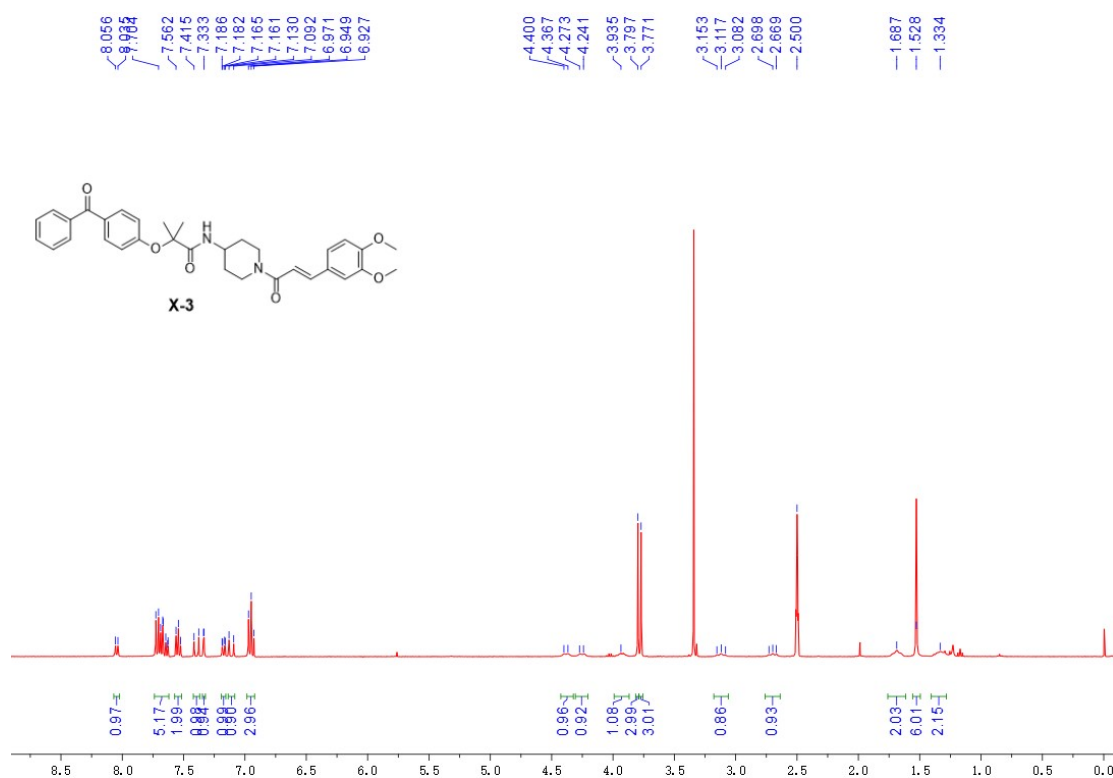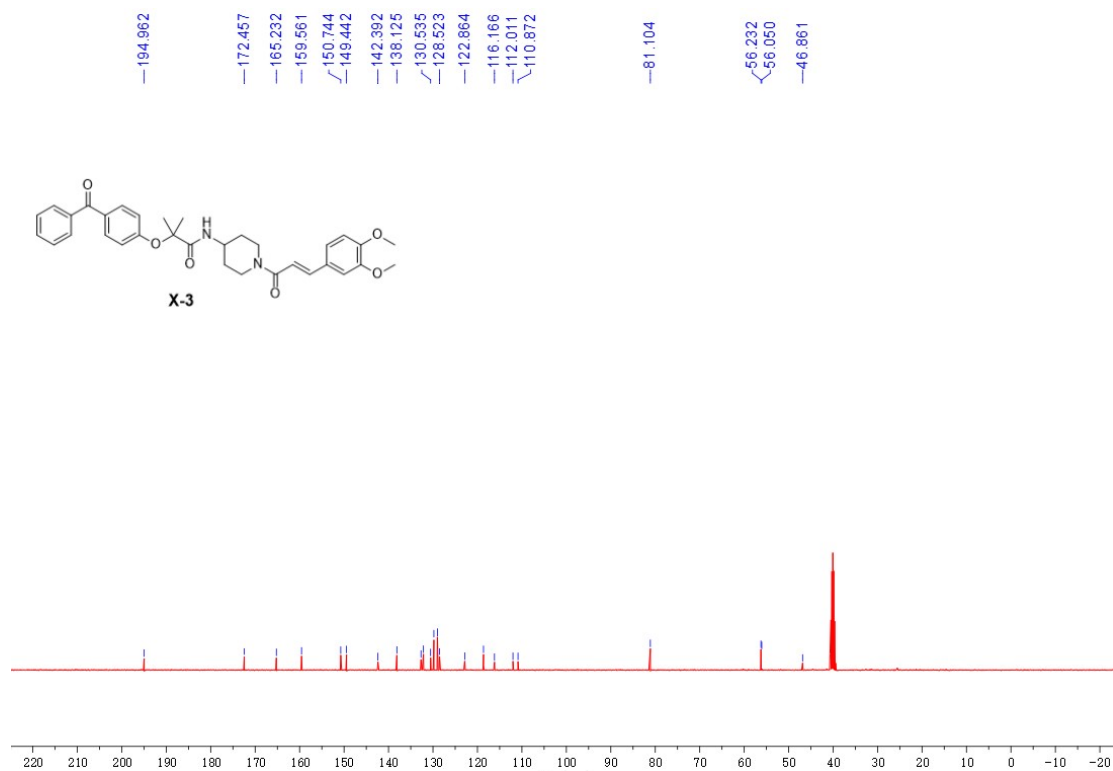

### HPLC purity traces for final compounds X-3

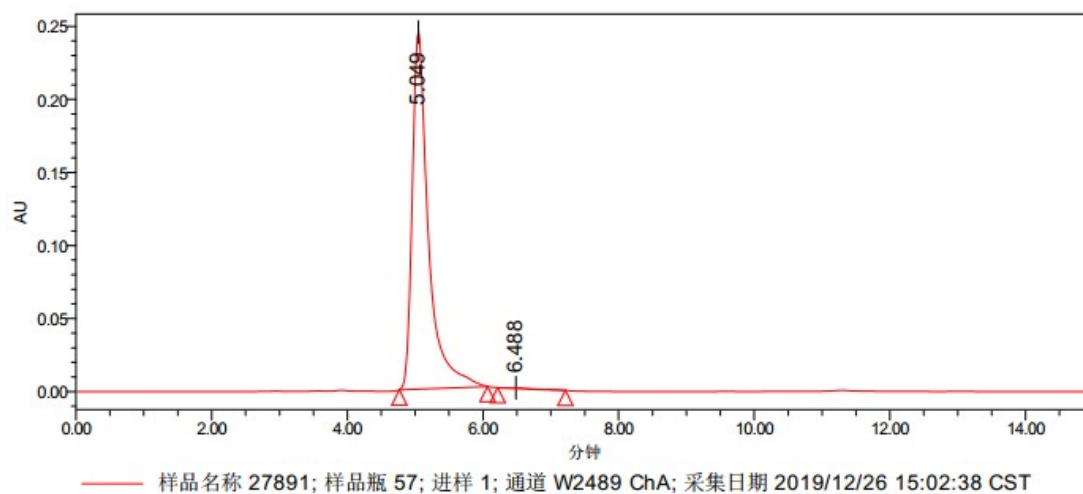

处理通道: W2489 ChA 254nm

| 处理通道              | 保留时间 (分钟) | 面积      | % 面积  | 峰高     |
|-------------------|-----------|---------|-------|--------|
| 1 W2489 ChA 254nm | 5.049     | 4062843 | 99.81 | 244308 |
| 2 W2489 ChA 254nm | 6.488     | 7719    | 0.19  | 306    |

### <sup>1</sup>H NMR and <sup>13</sup>C NMR of final compounds X-4

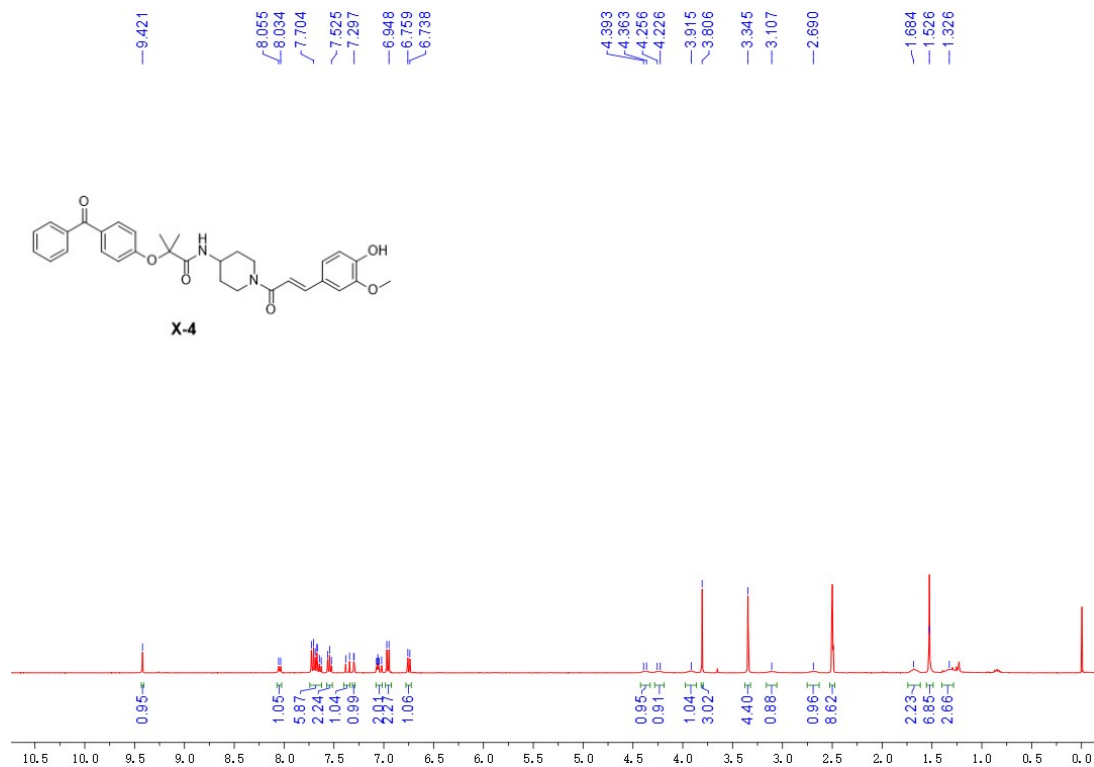

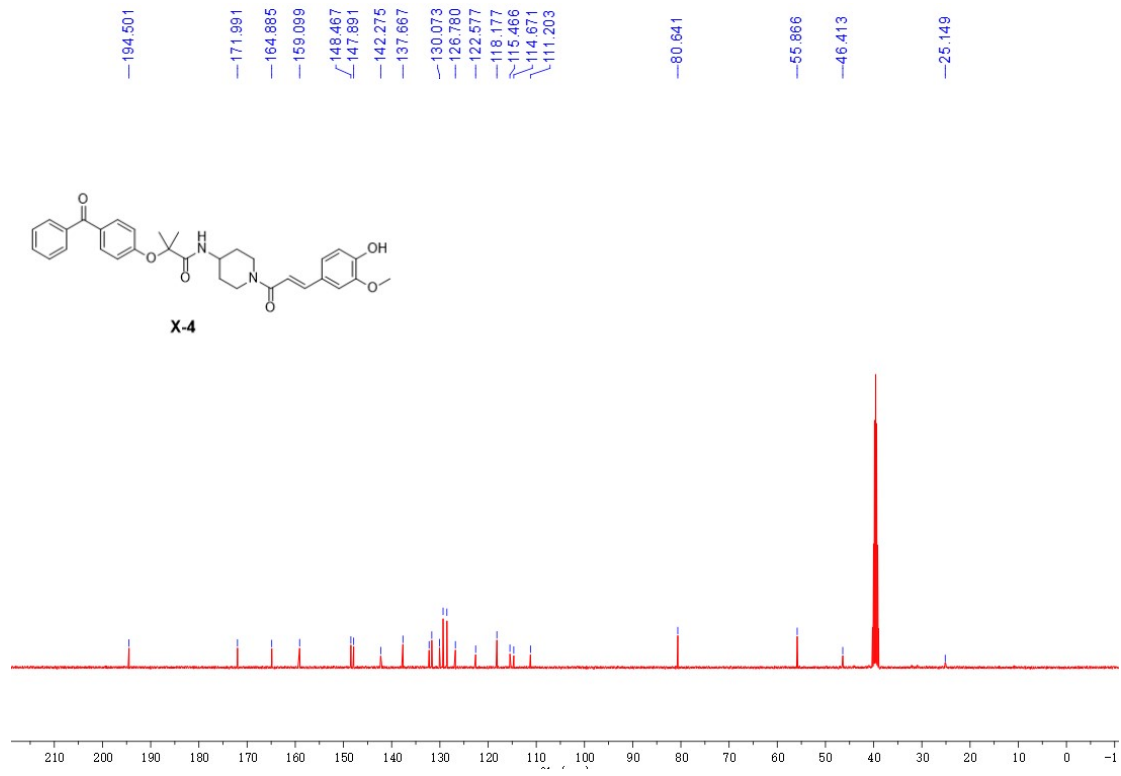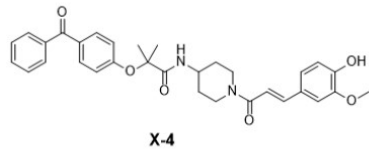

HPLC purity traces for final compounds **X-4**

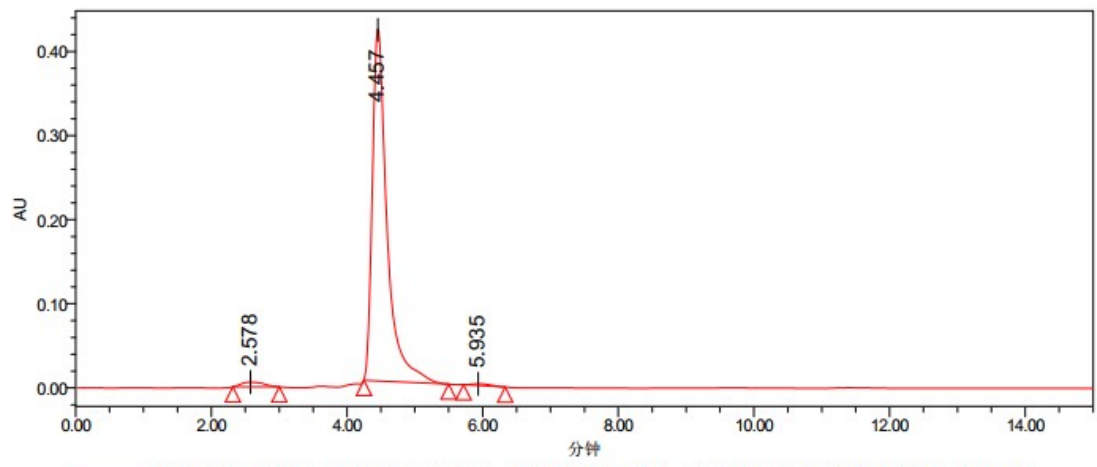

— 样品名称 27888; 样品瓶 55; 进样 1; 通道 W2489 ChA; 采集日期 2019/12/26 14:31:18 CST

处理通道: **W2489 ChA 254nm**

|   | 处理通道            | 保留时间<br>(分钟) | 面积      | % 面积  | 峰高     |
|---|-----------------|--------------|---------|-------|--------|
| 1 | W2489 ChA 254nm | 2.578        | 131250  | 2.03  | 5734   |
| 2 | W2489 ChA 254nm | 4.457        | 6303646 | 97.34 | 419845 |
| 3 | W2489 ChA 254nm | 5.935        | 41001   | 0.63  | 2088   |

# <sup>1</sup>H NMR and <sup>13</sup>C NMR of final compounds X-5

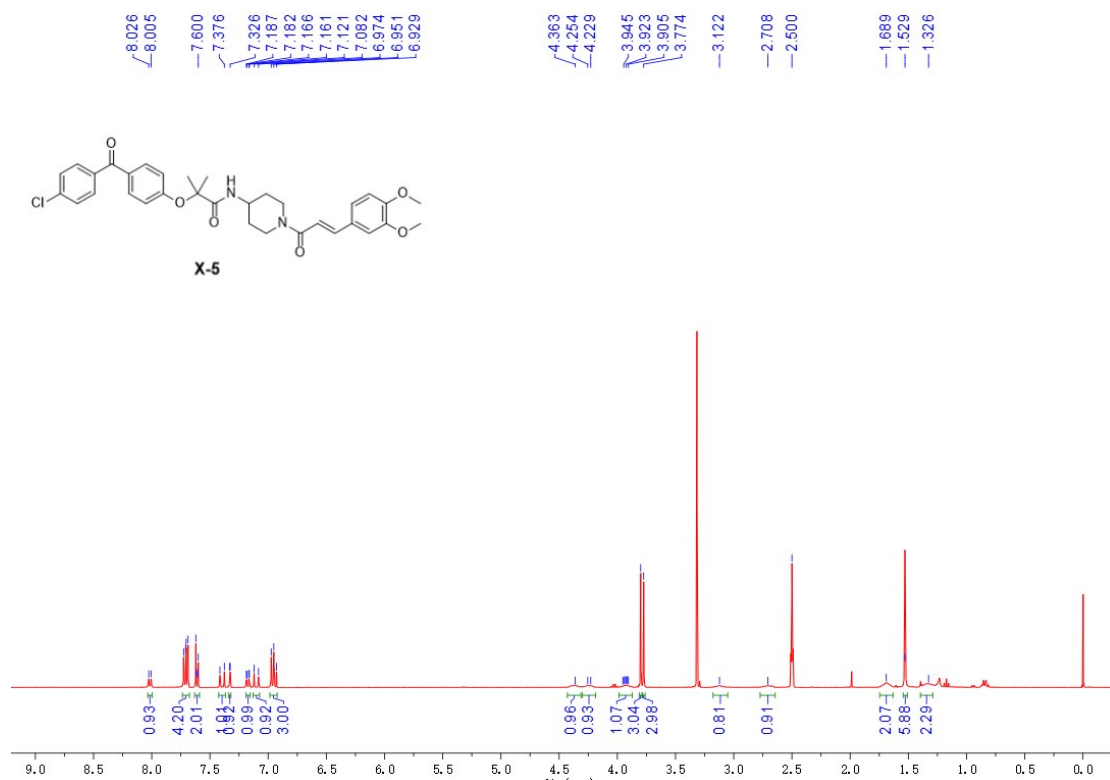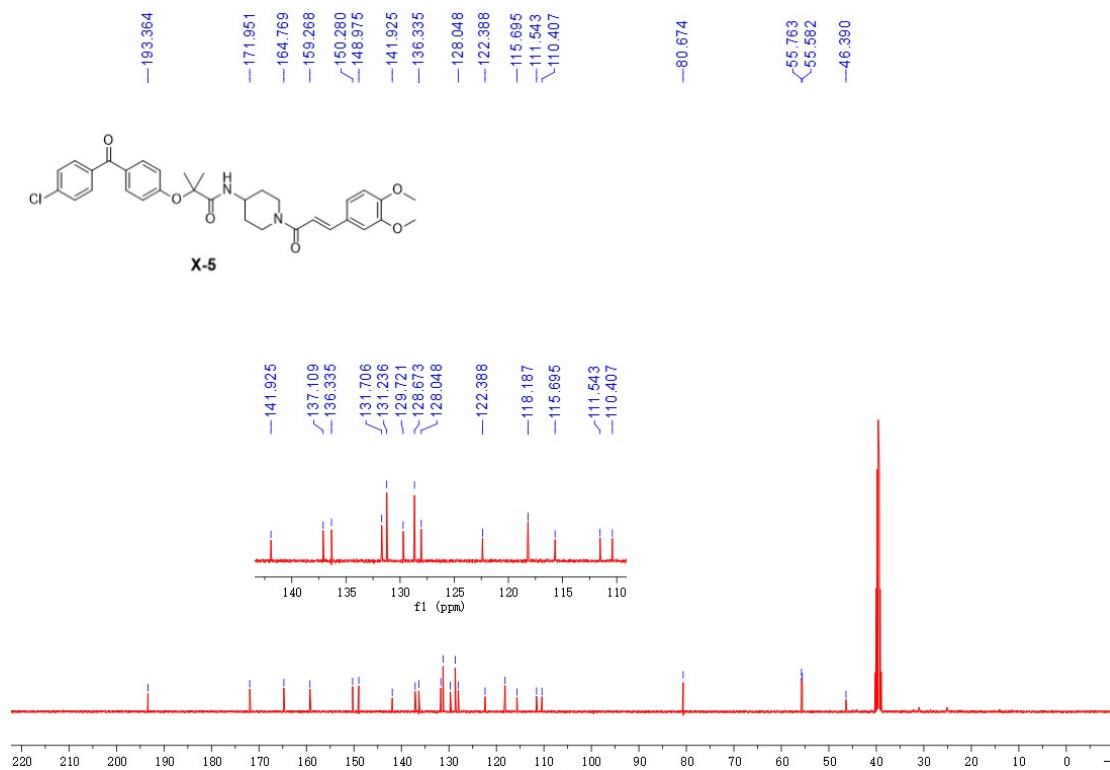



### HPLC purity traces for final compounds X-5

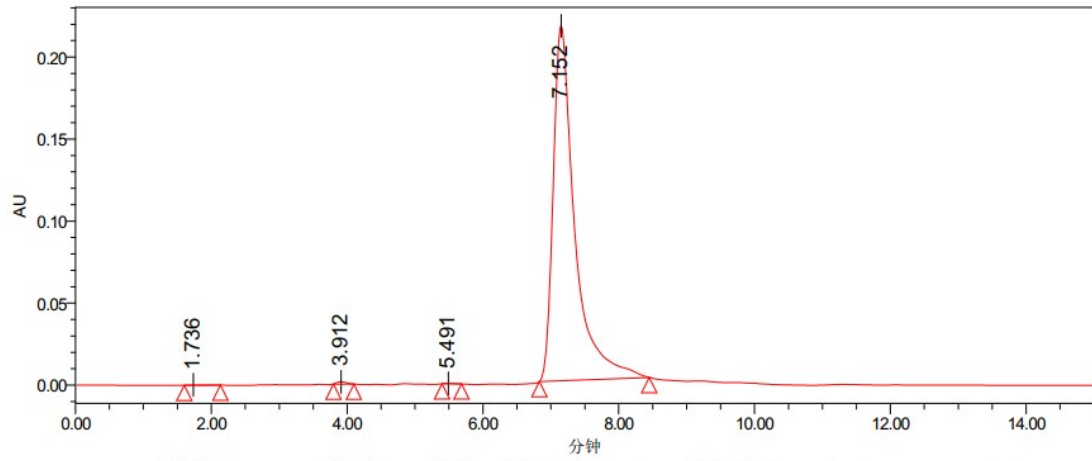

— 样品名称 27890; 样品瓶 56; 进样 1; 通道 W2489 ChA; 采集日期 2019/12/26 14:46:59 CST

处理通道: W2489 ChA 254nm

| 处理通道              | 保留时间 (分钟) | 面积      | % 面积  | 峰高     |
|-------------------|-----------|---------|-------|--------|
| 1 W2489 ChA 254nm | 1.736     | 1291    | 0.03  | 95     |
| 2 W2489 ChA 254nm | 3.912     | 13223   | 0.28  | 1407   |
| 3 W2489 ChA 254nm | 5.491     | 2880    | 0.06  | 287    |
| 4 W2489 ChA 254nm | 7.152     | 4750831 | 99.64 | 216557 |

### <sup>1</sup>H NMR and <sup>13</sup>C NMR of final compounds X-6

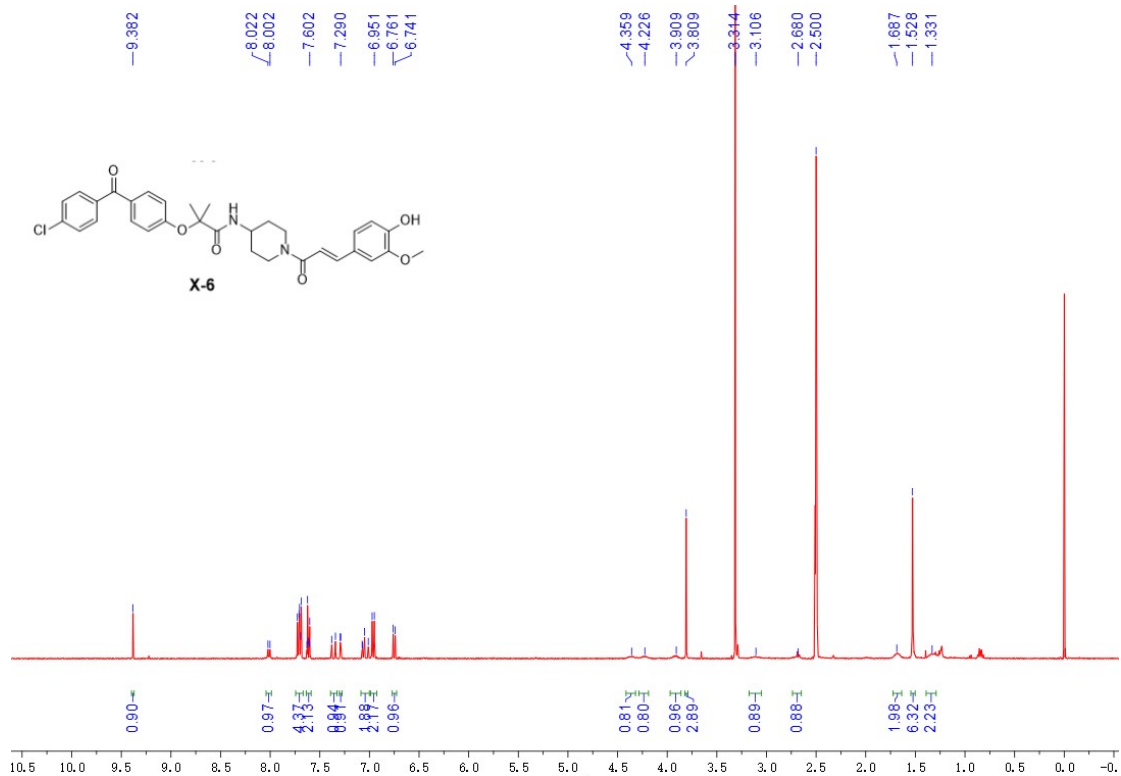

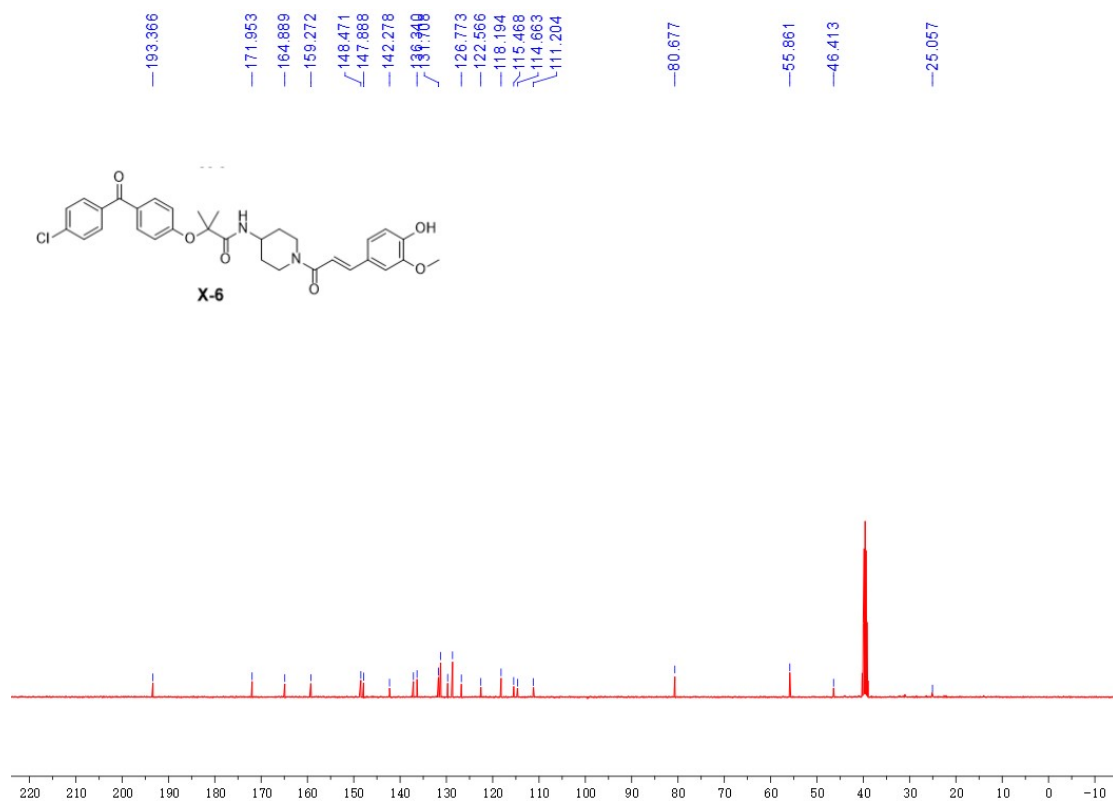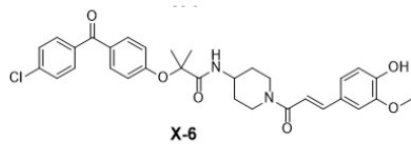

### HPLC purity traces for final compounds X-6

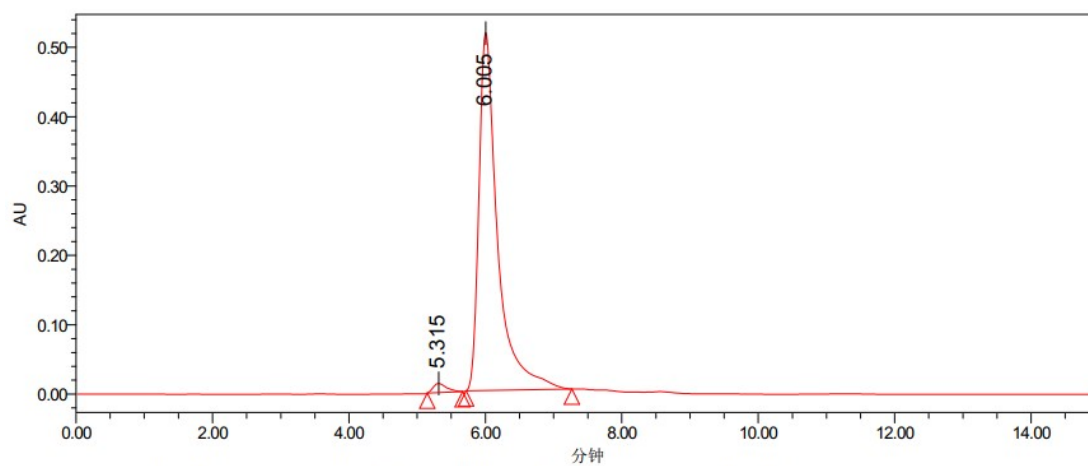

— 样品名称 27880-1; 样品瓶 52; 进样 1; 通道 W2489 ChA; 采集日期 2019/12/26 9:27:43 CST

#### 处理通道: W2489 ChA 254nm

|   | 处理通道            | 保留时间 (分钟) | 面积      | % 面积  | 峰高     |
|---|-----------------|-----------|---------|-------|--------|
| 1 | W2489 ChA 254nm | 5.315     | 179210  | 1.79  | 13205  |
| 2 | W2489 ChA 254nm | 6.005     | 9841444 | 98.21 | 516739 |

# $^1\text{H}$ NMR and $^{13}\text{C}$ NMR of final compounds X-7

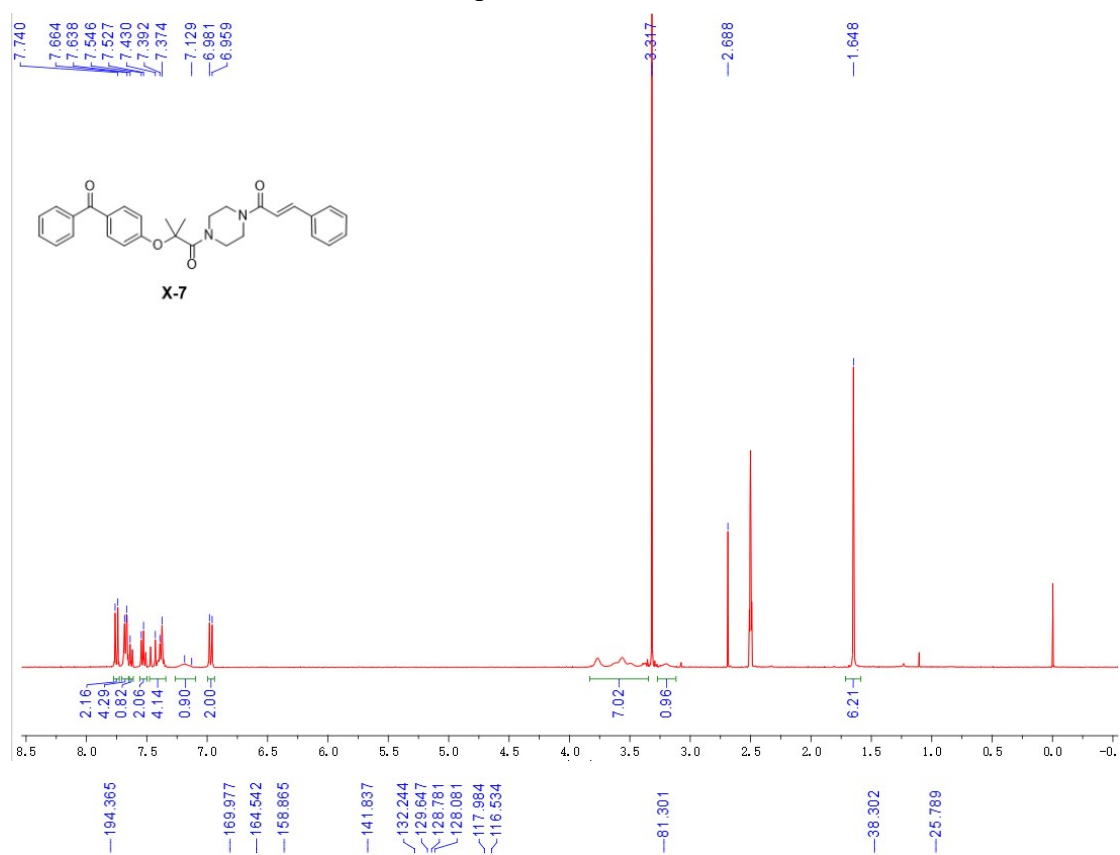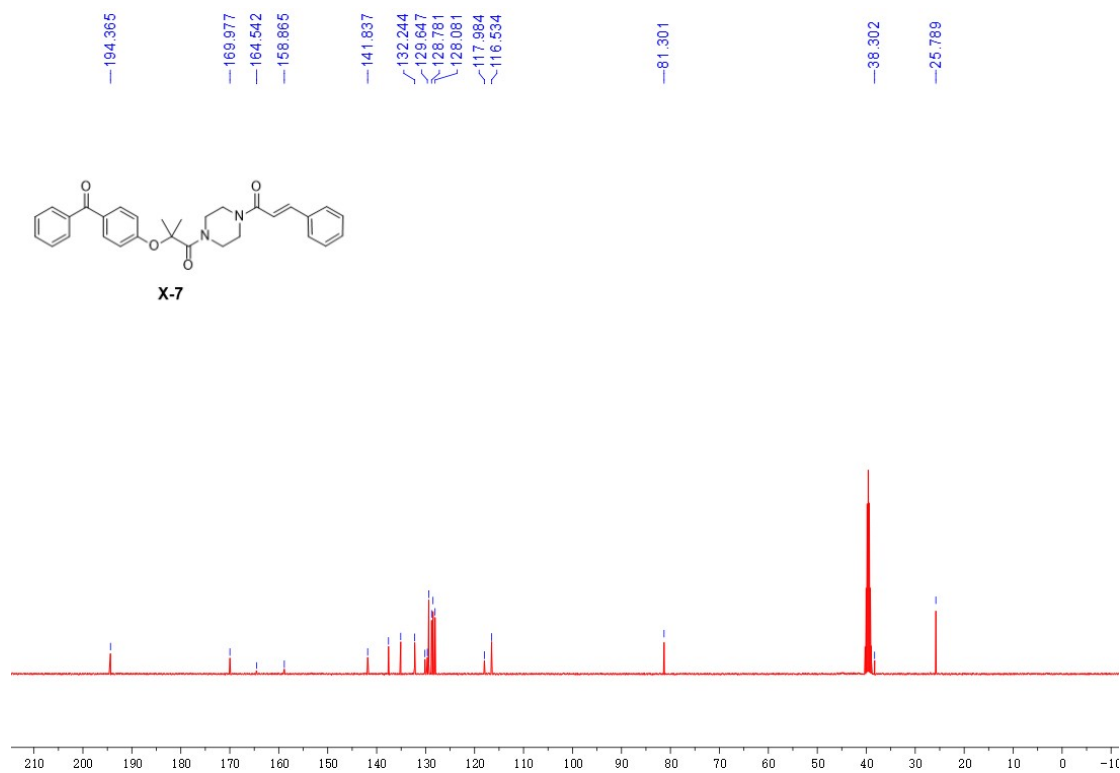

### HPLC purity traces for final compounds X-7

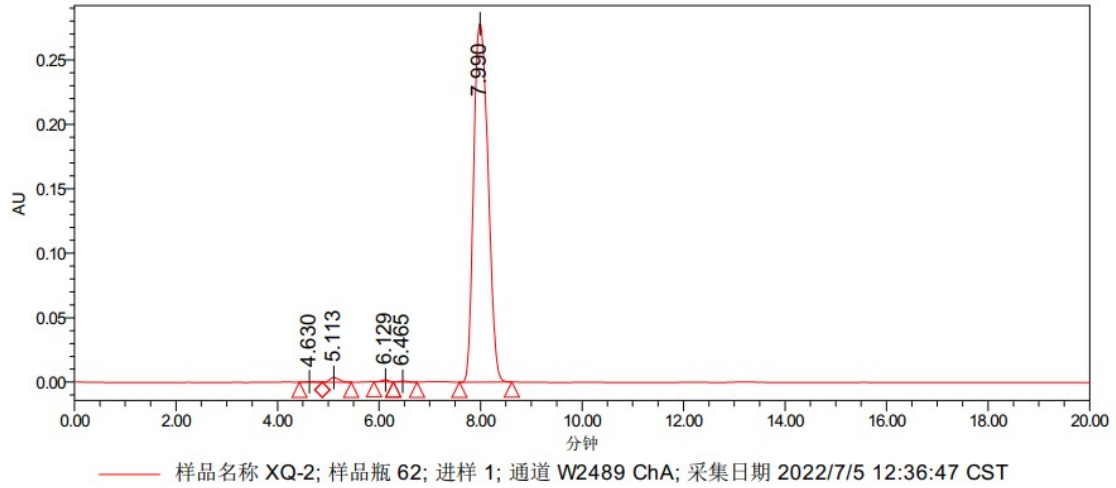

处理通道: W2489 ChA 254nm

| 处理通道              | 保留时间 (分钟) | 面积      | % 面积  | 峰高     |
|-------------------|-----------|---------|-------|--------|
| 1 W2489 ChA 254nm | 4.630     | 6575    | 0.12  | 487    |
| 2 W2489 ChA 254nm | 5.113     | 48436   | 0.87  | 3720   |
| 3 W2489 ChA 254nm | 6.129     | 14123   | 0.25  | 1515   |
| 4 W2489 ChA 254nm | 6.465     | 9865    | 0.18  | 700    |
| 5 W2489 ChA 254nm | 7.990     | 5492963 | 98.58 | 278366 |

### <sup>1</sup>H NMR and <sup>13</sup>C NMR of final compounds X-8

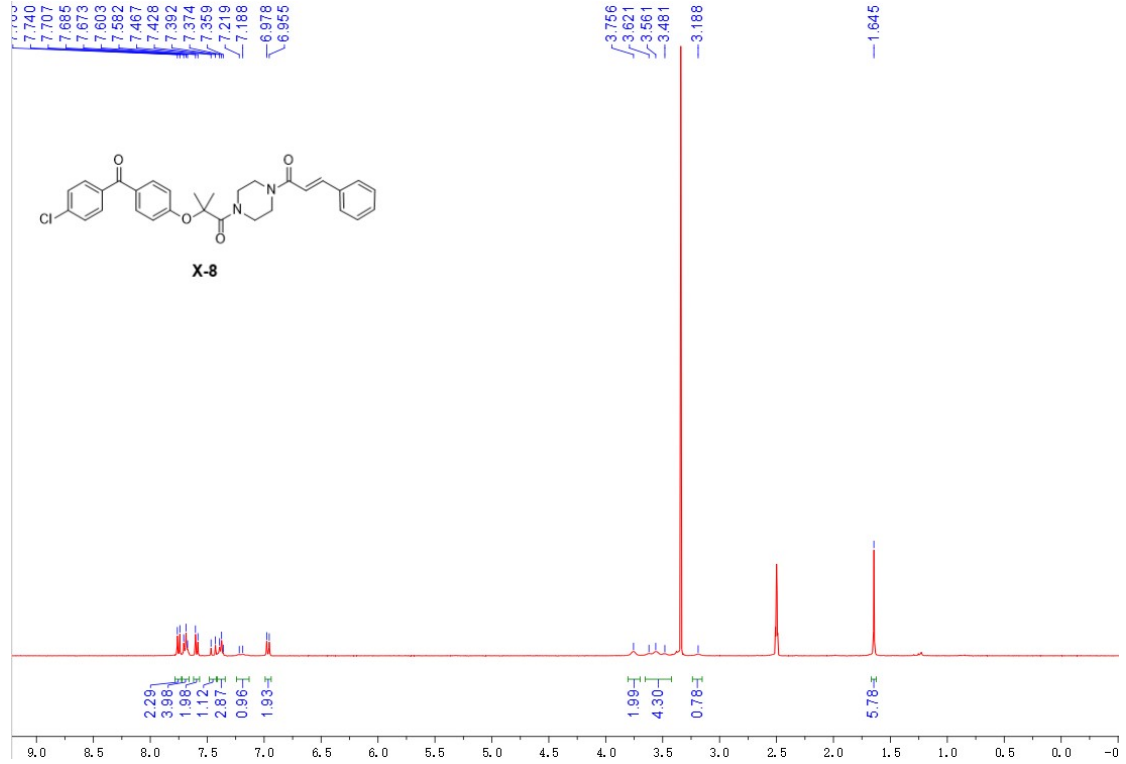

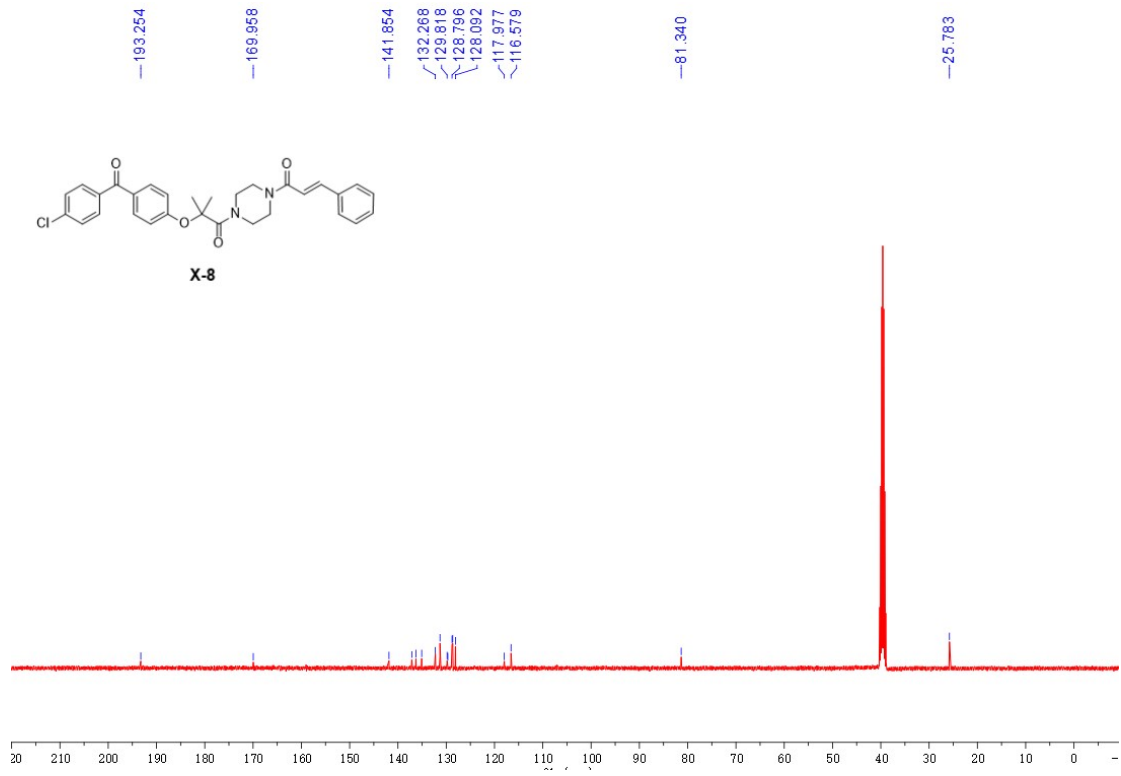

HPLC purity traces for final compounds **X-8**

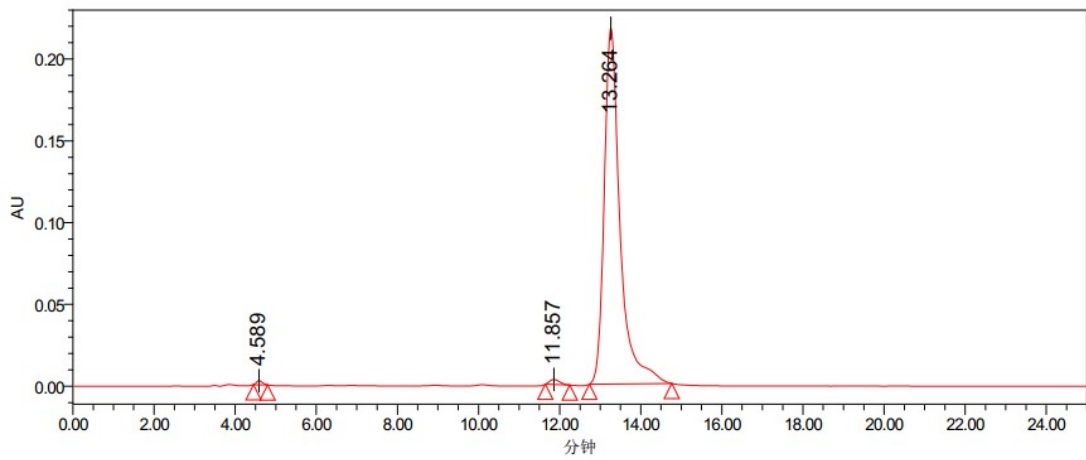

— 样品名称 28151; 样品瓶 11; 进样 1; 通道 W2489 ChA; 采集日期 2020/5/6 11:21:51 CST

处理通道: **W2489 ChA 254nm**

|   | 处理通道            | 保留时间<br>(分钟) | 面积      | % 面积  | 峰高     |
|---|-----------------|--------------|---------|-------|--------|
| 1 | W2489 ChA 254nm | 4.589        | 25367   | 0.42  | 2518   |
| 2 | W2489 ChA 254nm | 11.857       | 54171   | 0.90  | 3096   |
| 3 | W2489 ChA 254nm | 13.264       | 5906339 | 98.67 | 217638 |

# <sup>1</sup>H NMR and <sup>13</sup>C NMR of final compounds X-9

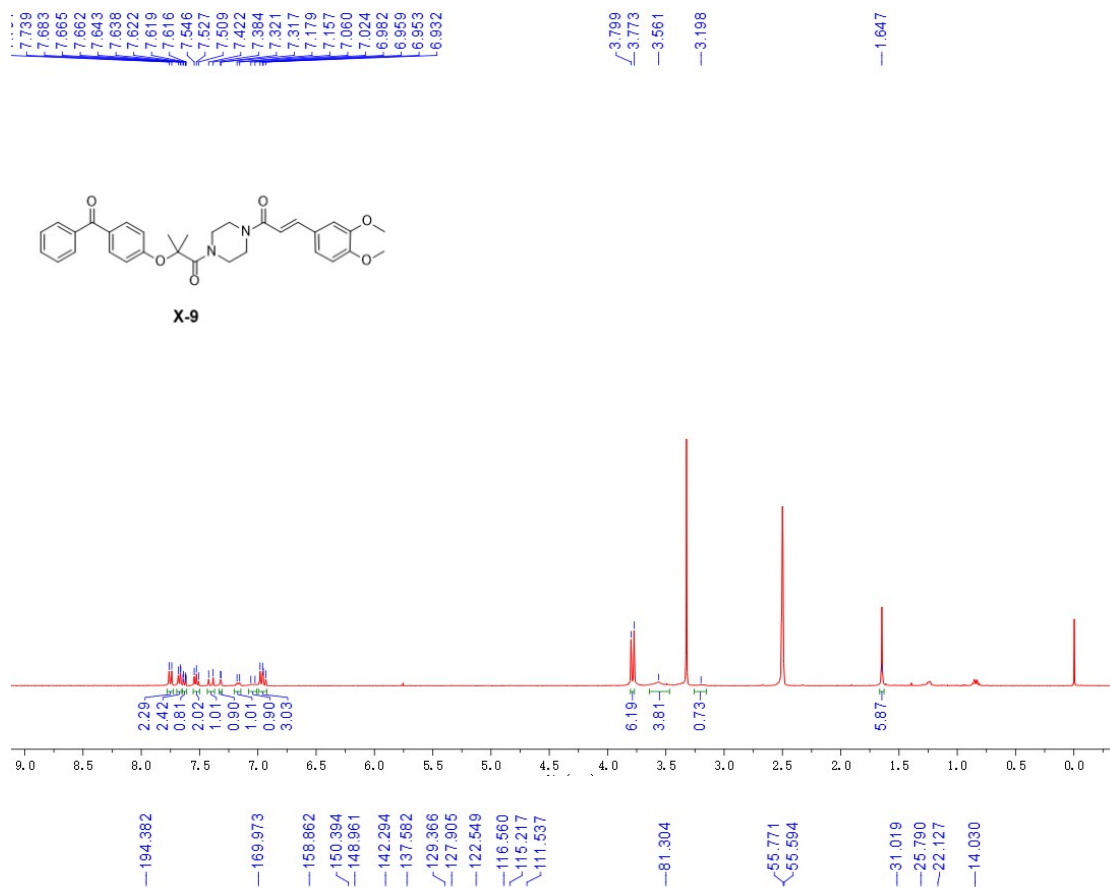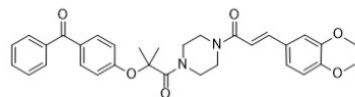

**X-9**

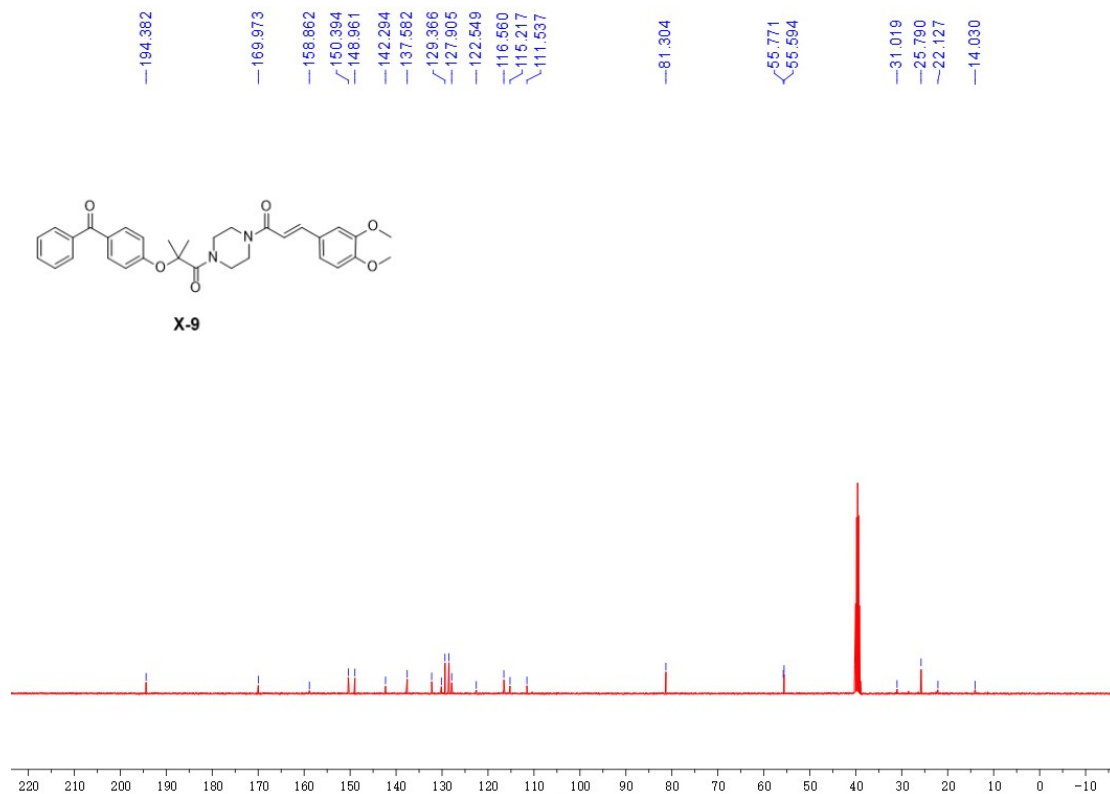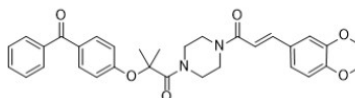

**X-9**

## HPLC purity traces for final compounds X-9

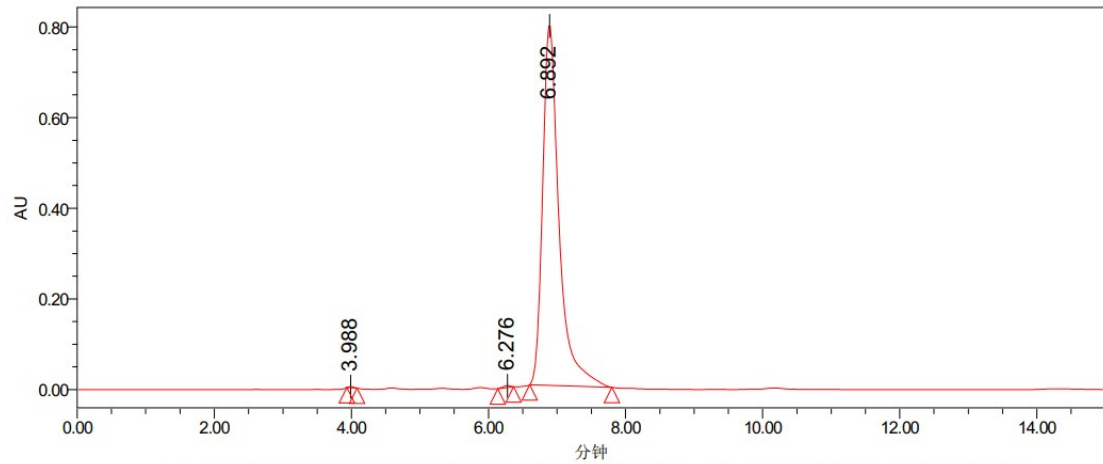

— 样品名称 28152; 样品瓶 13; 进样 1; 通道 W2489 ChA; 采集日期 2020/5/6 10:35:12 CST

处理通道: W2489 ChA 254nm

|   | 处理通道            | 保留时间<br>(分钟) | 面积       | % 面积  | 峰高     |
|---|-----------------|--------------|----------|-------|--------|
| 1 | W2489 ChA 254nm | 3.988        | 15068    | 0.11  | 2795   |
| 2 | W2489 ChA 254nm | 6.276        | 31986    | 0.24  | 4182   |
| 3 | W2489 ChA 254nm | 6.892        | 13228229 | 99.65 | 796151 |

## $^1\text{H}$ NMR and $^{13}\text{C}$ NMR of final compounds X-10

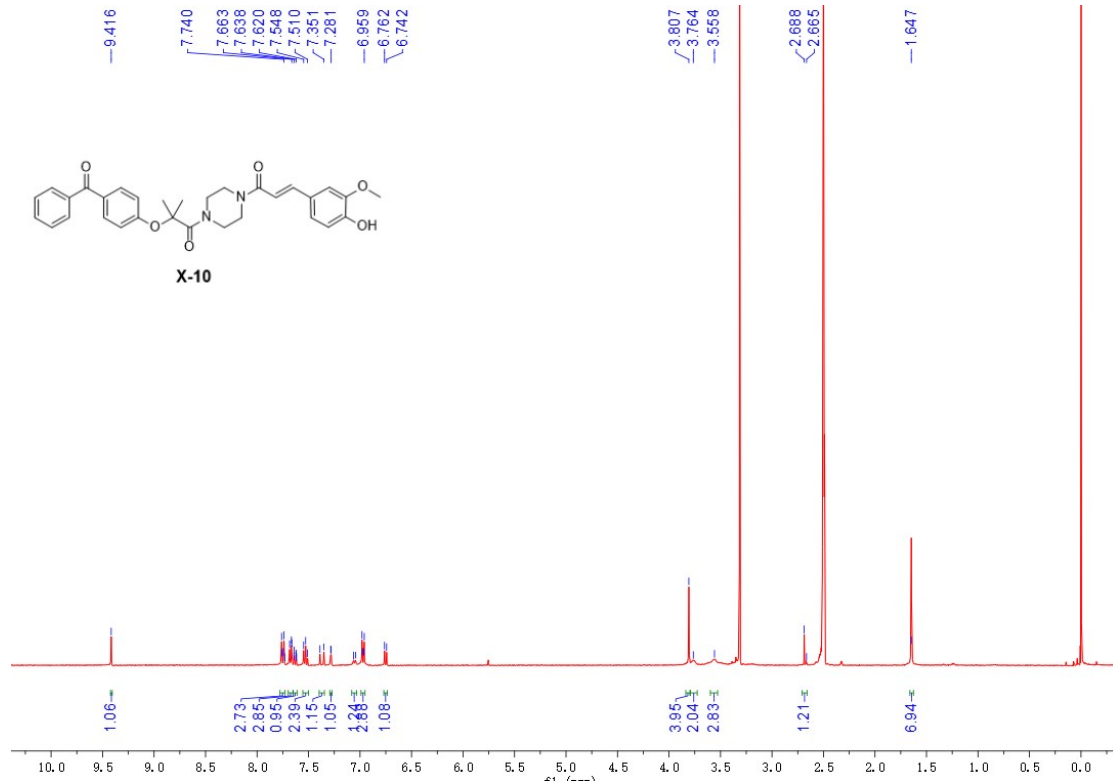

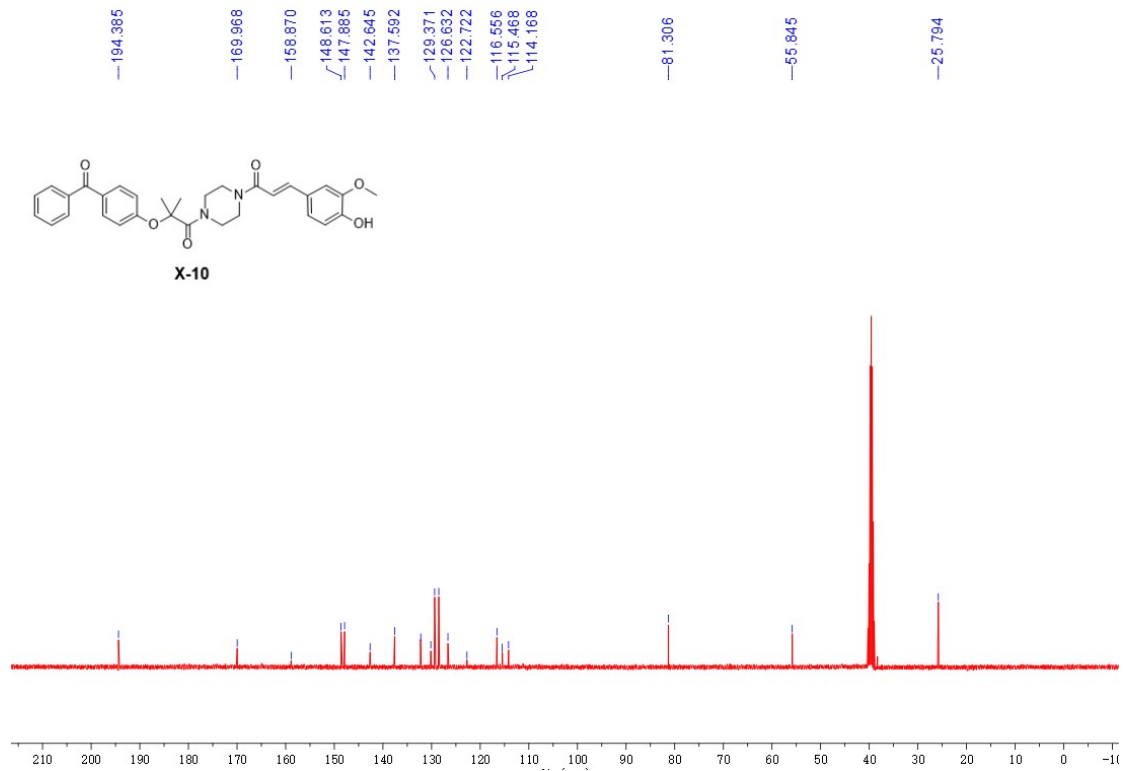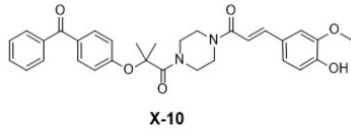

### HPLC purity traces for final compounds X-10

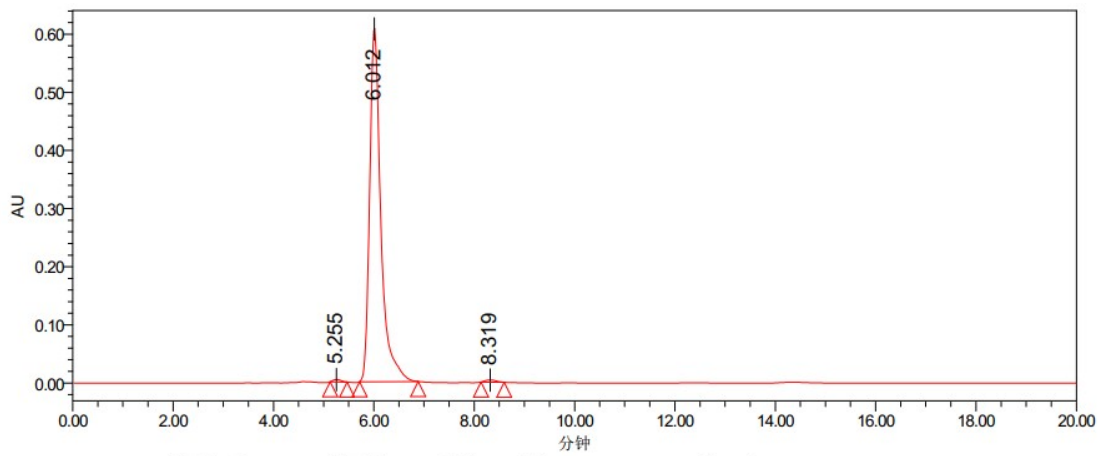

— 样品名称 28154; 样品瓶 12; 进样 1; 通道 W2489 ChA; 采集日期 2020/5/6 11:47:31 CST

#### 处理通道: W2489 ChA 254nm

|   | 处理通道            | 保留时间<br>(分钟) | 面积      | % 面积  | 峰高     |
|---|-----------------|--------------|---------|-------|--------|
| 1 | W2489 ChA 254nm | 5.255        | 42987   | 0.45  | 4120   |
| 2 | W2489 ChA 254nm | 6.012        | 9444726 | 98.94 | 608354 |
| 3 | W2489 ChA 254nm | 8.319        | 58323   | 0.61  | 3929   |



# $^1\text{H}$ NMR and $^{13}\text{C}$ NMR of final compounds X-11

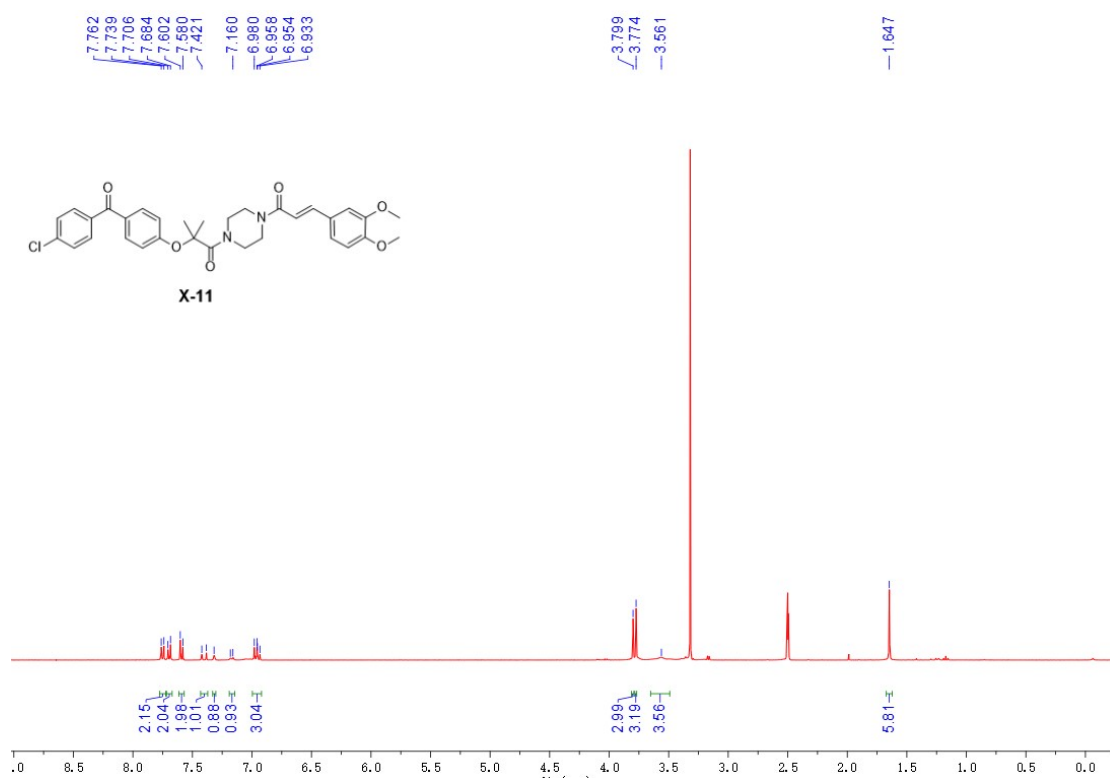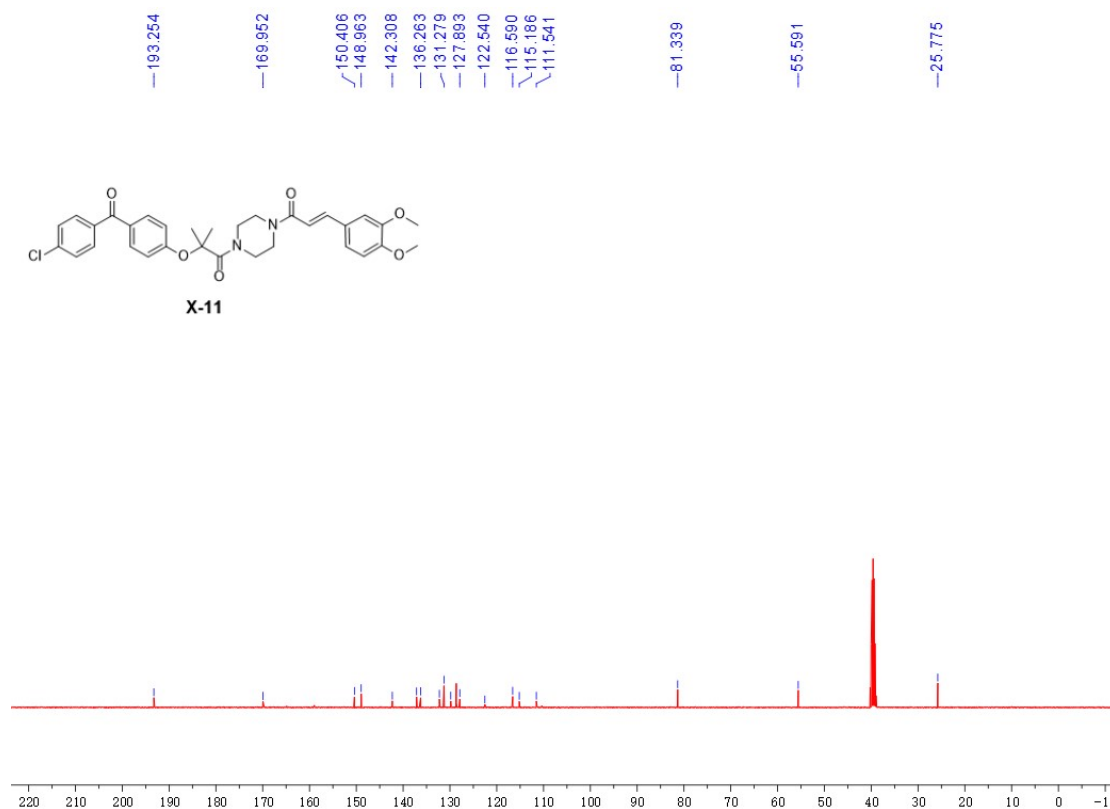

## HPLC purity traces for final compounds X-11

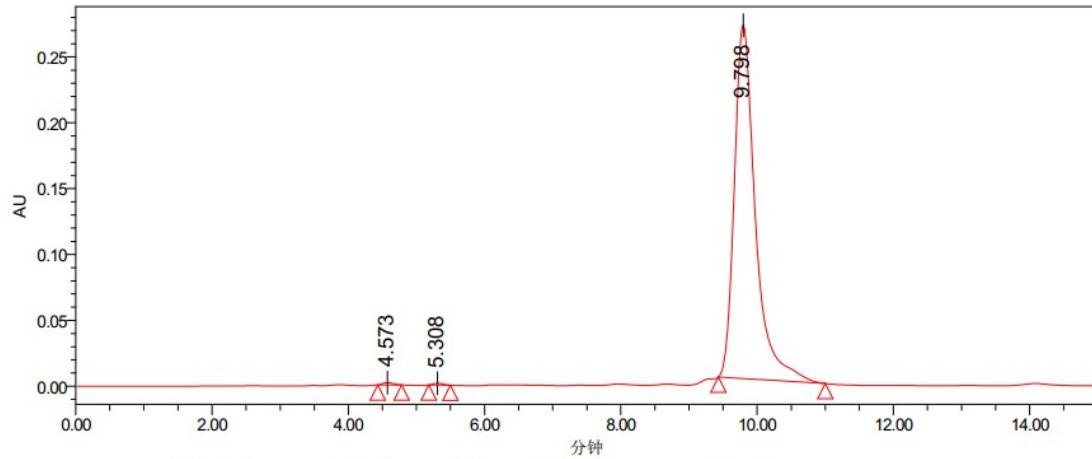

— 样品名称 27897; 样品瓶 11; 进样 1; 通道 W2489 ChA; 采集日期 2020/5/6 10:19:30 CST

处理通道: **W2489 ChA 254nm**

|   | 处理通道            | 保留时间<br>(分钟) | 面积      | % 面积  | 峰高     |
|---|-----------------|--------------|---------|-------|--------|
| 1 | W2489 ChA 254nm | 4.573        | 19236   | 0.33  | 1808   |
| 2 | W2489 ChA 254nm | 5.308        | 14093   | 0.24  | 1417   |
| 3 | W2489 ChA 254nm | 9.798        | 5751437 | 99.42 | 268488 |

## $^1\text{H}$ NMR and $^{13}\text{C}$ NMR of final compounds X-12

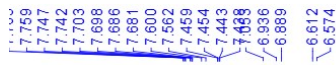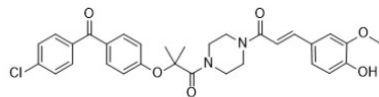

**X-12**

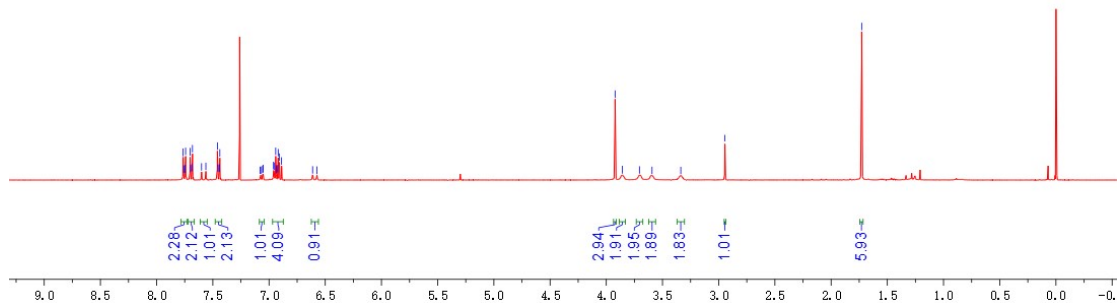

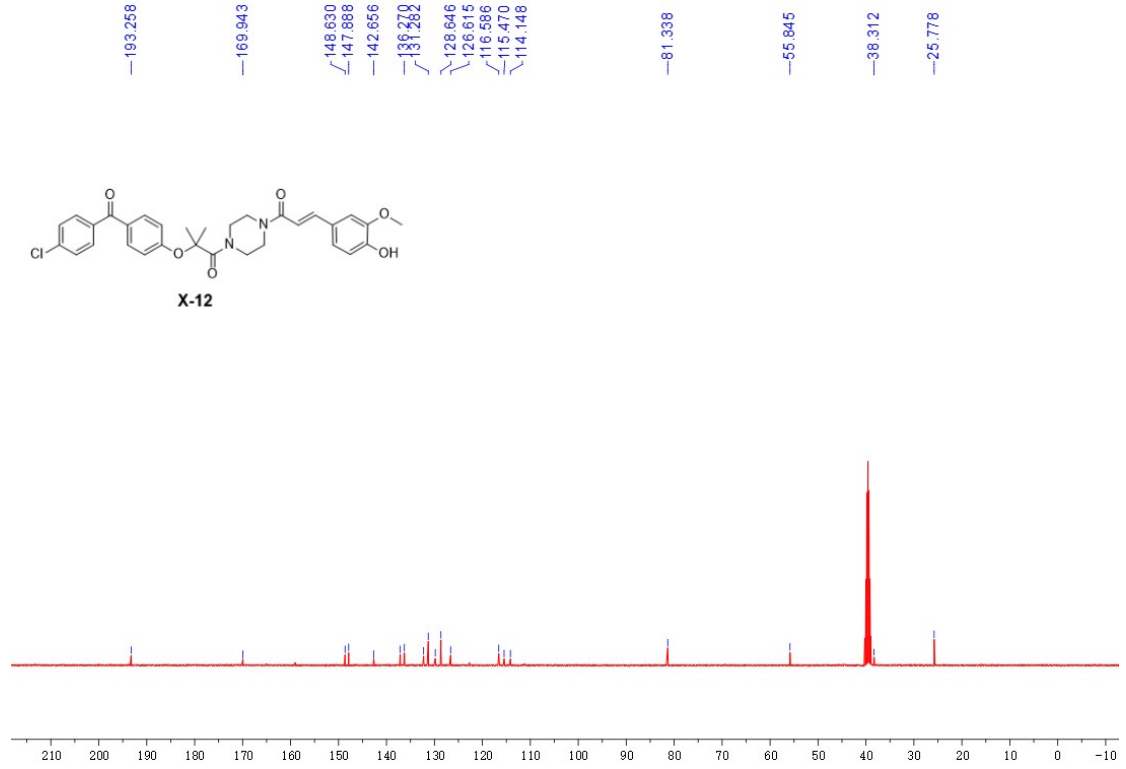

### HPLC purity traces for final compounds X-12

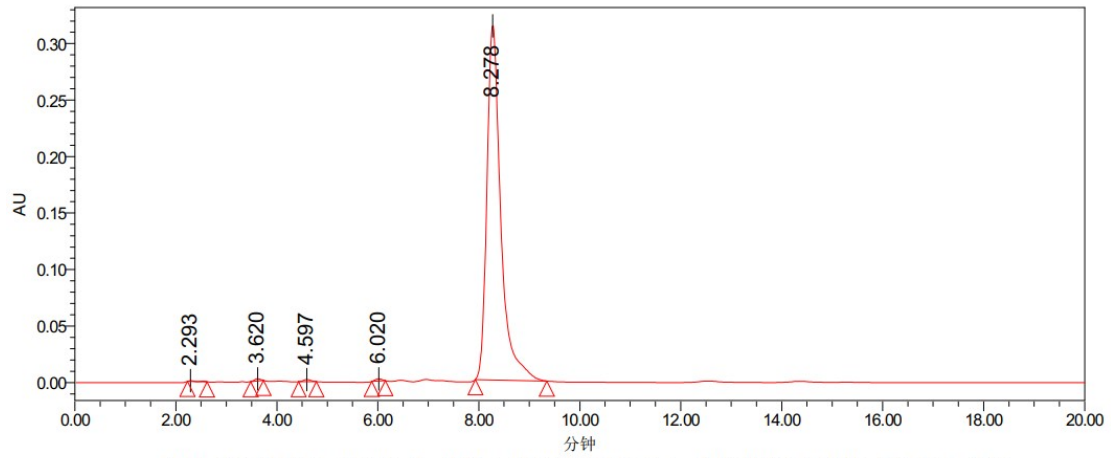

— 样品名称 28172; 样品瓶 13; 进样 1; 通道 W2489 ChA; 采集日期 2020/5/6 12:08:10 CST

#### 处理通道: W2489 ChA 254nm

|   | 处理通道            | 保留时间<br>(分钟) | 面积      | % 面积  | 峰高     |
|---|-----------------|--------------|---------|-------|--------|
| 1 | W2489 ChA 254nm | 2.293        | 6248    | 0.10  | 588    |
| 2 | W2489 ChA 254nm | 3.620        | 15768   | 0.26  | 1932   |
| 3 | W2489 ChA 254nm | 4.597        | 19023   | 0.31  | 1897   |
| 4 | W2489 ChA 254nm | 6.020        | 17933   | 0.30  | 1909   |
| 5 | W2489 ChA 254nm | 8.278        | 5988372 | 99.02 | 313927 |

# $^1\text{H}$ NMR and $^{13}\text{C}$ NMR of final compounds X-13

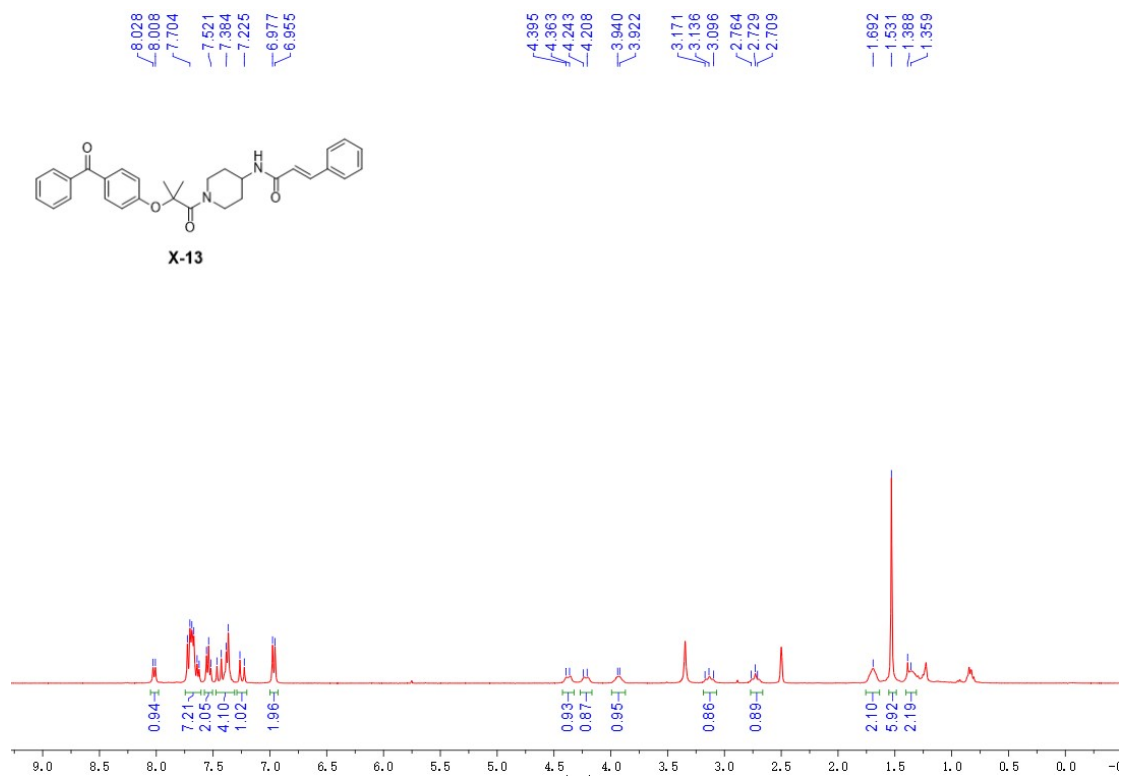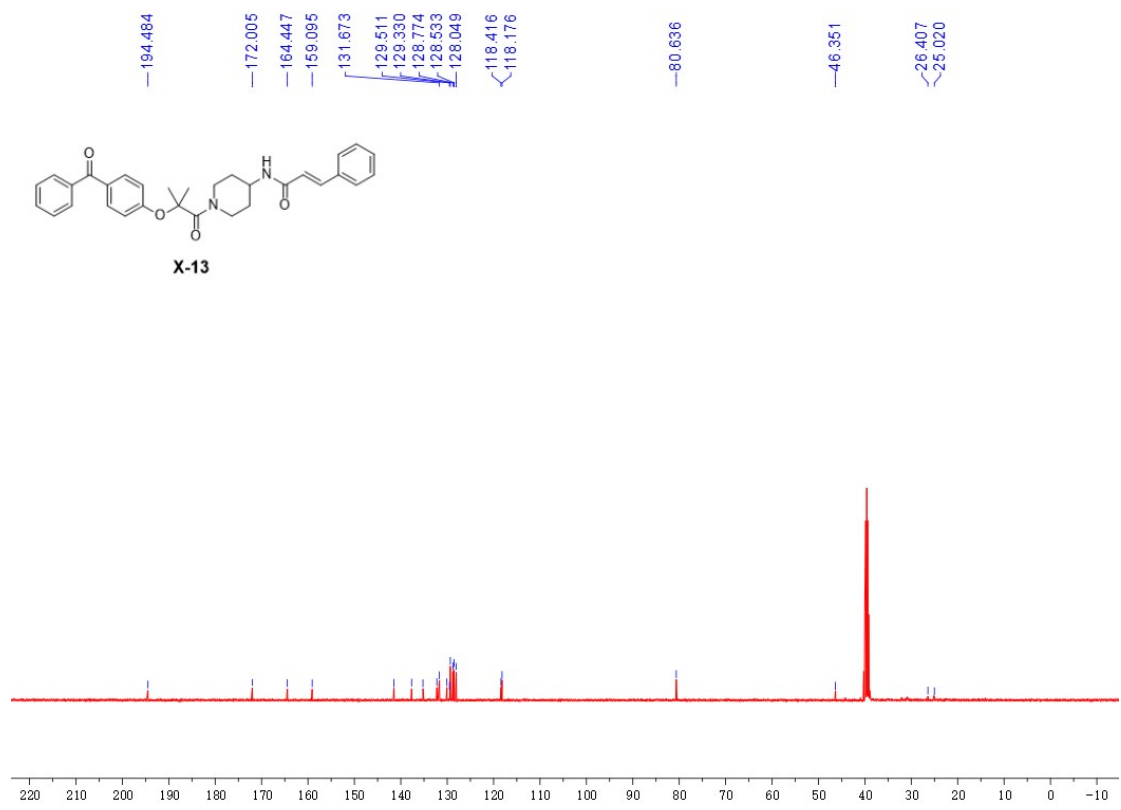

### HPLC purity traces for final compounds X-13

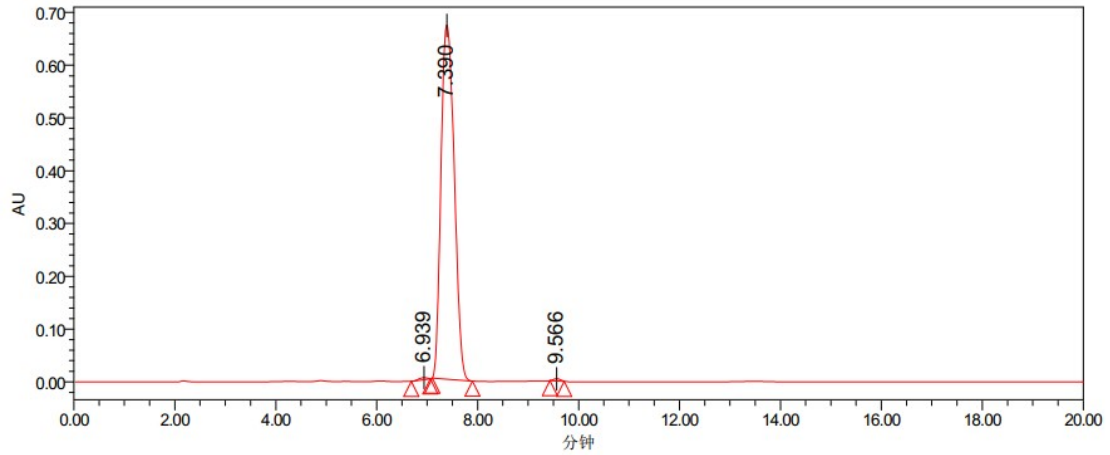

— 样品名称 XQ-3; 样品瓶 63; 进样 1; 通道 W2489 ChA; 采集日期 2022/7/5 12:57:24 CST

处理通道: W2489 ChA 254nm

|   | 处理通道            | 保留时间<br>(分钟) | 面积       | % 面积  | 峰高     |
|---|-----------------|--------------|----------|-------|--------|
| 1 | W2489 ChA 254nm | 6.939        | 48151    | 0.39  | 3947   |
| 2 | W2489 ChA 254nm | 7.390        | 12216898 | 99.29 | 671926 |
| 3 | W2489 ChA 254nm | 9.566        | 39353    | 0.32  | 4176   |

### <sup>1</sup>H NMR and <sup>13</sup>C NMR of final compounds X-14

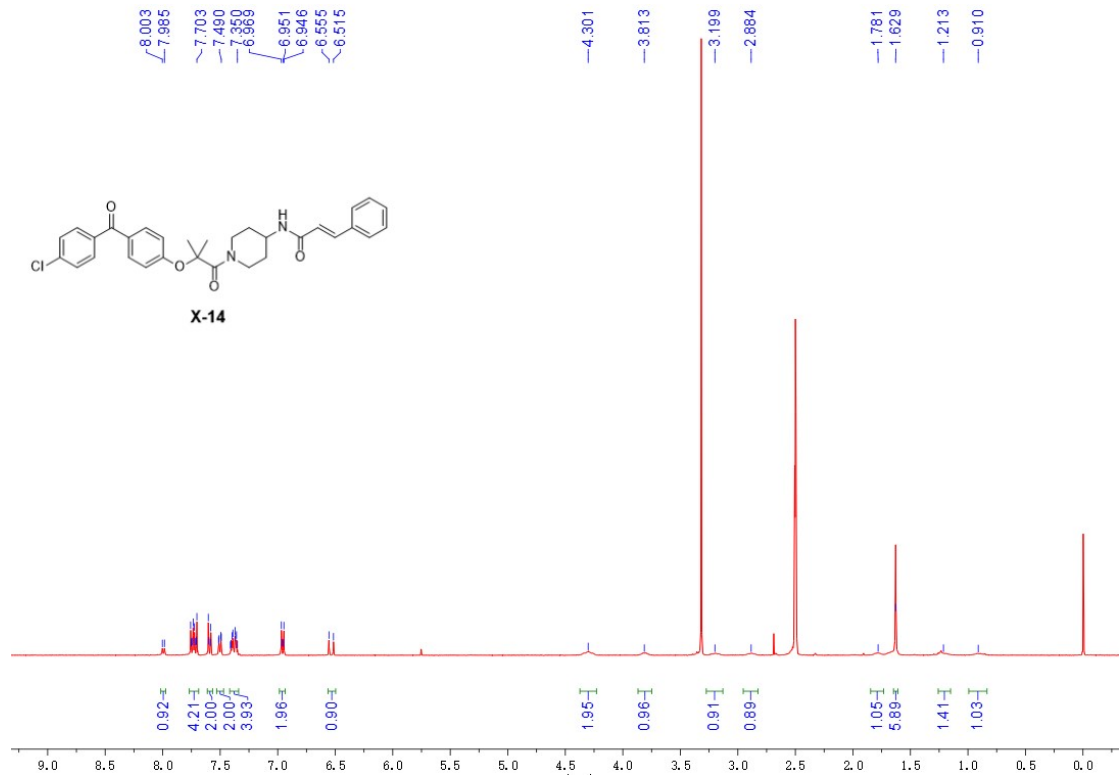

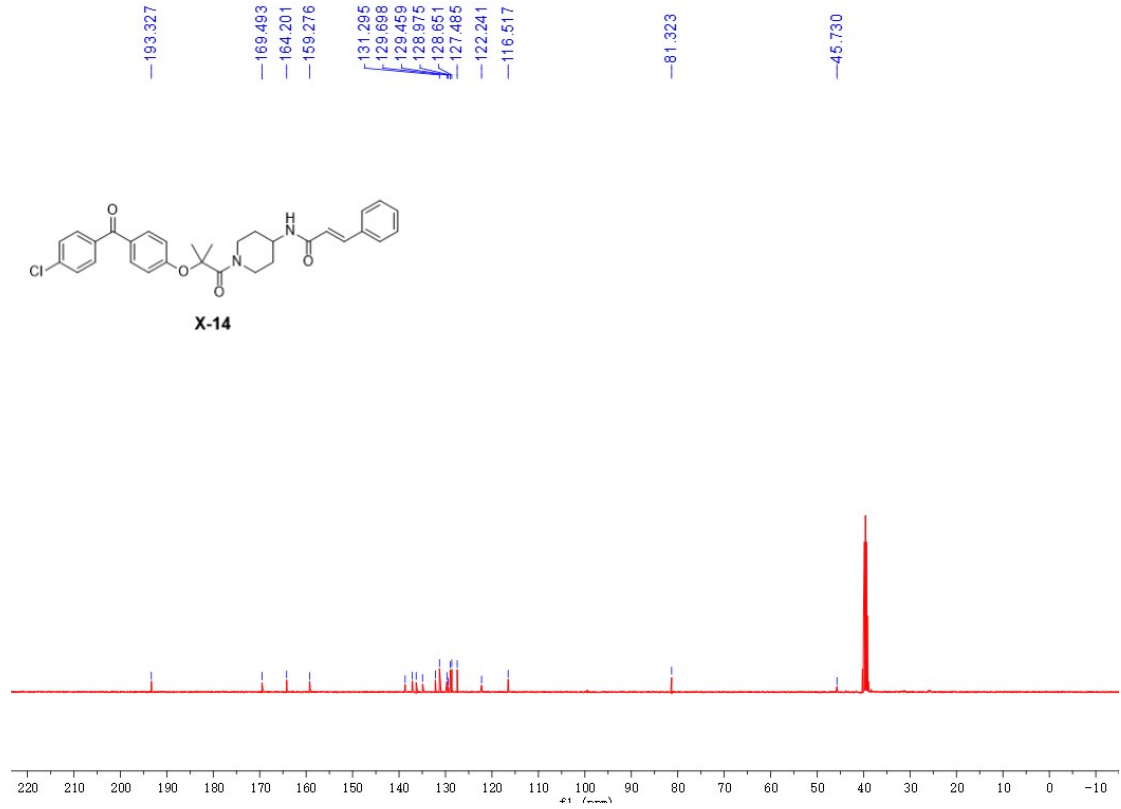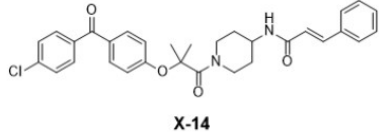

### HPLC purity traces for final compounds X-14

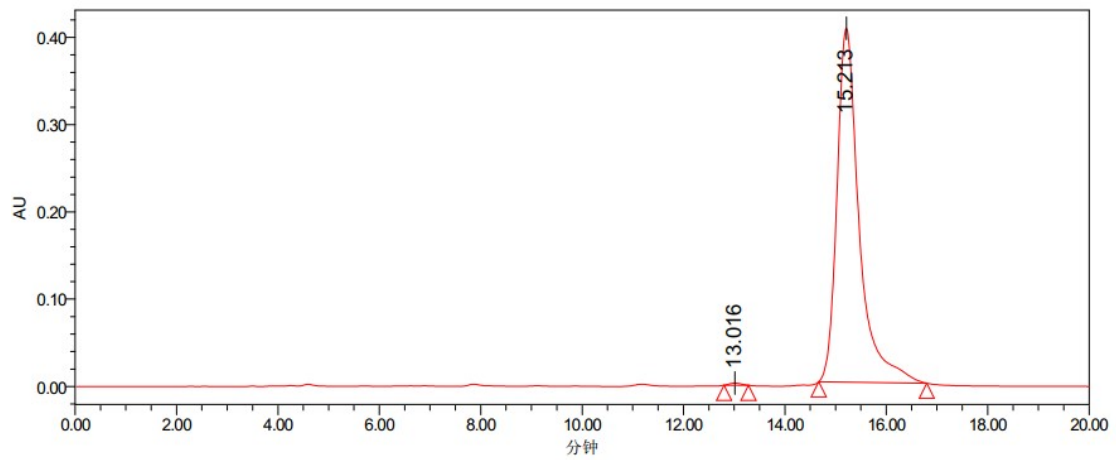

— 样品名称 41613; 样品瓶 14; 进样 1; 通道 W2489 ChA; 采集日期 2020/5/6 12:28:49 CST

处理通道: W2489 ChA 254nm

|   | 处理通道            | 保留时间 (分钟) | 面积       | % 面积  | 峰高     |
|---|-----------------|-----------|----------|-------|--------|
| 1 | W2489 ChA 254nm | 13.016    | 40663    | 0.33  | 2464   |
| 2 | W2489 ChA 254nm | 15.213    | 12355364 | 99.67 | 405726 |

# $^1\text{H}$ NMR and $^{13}\text{C}$ NMR of final compounds X-15

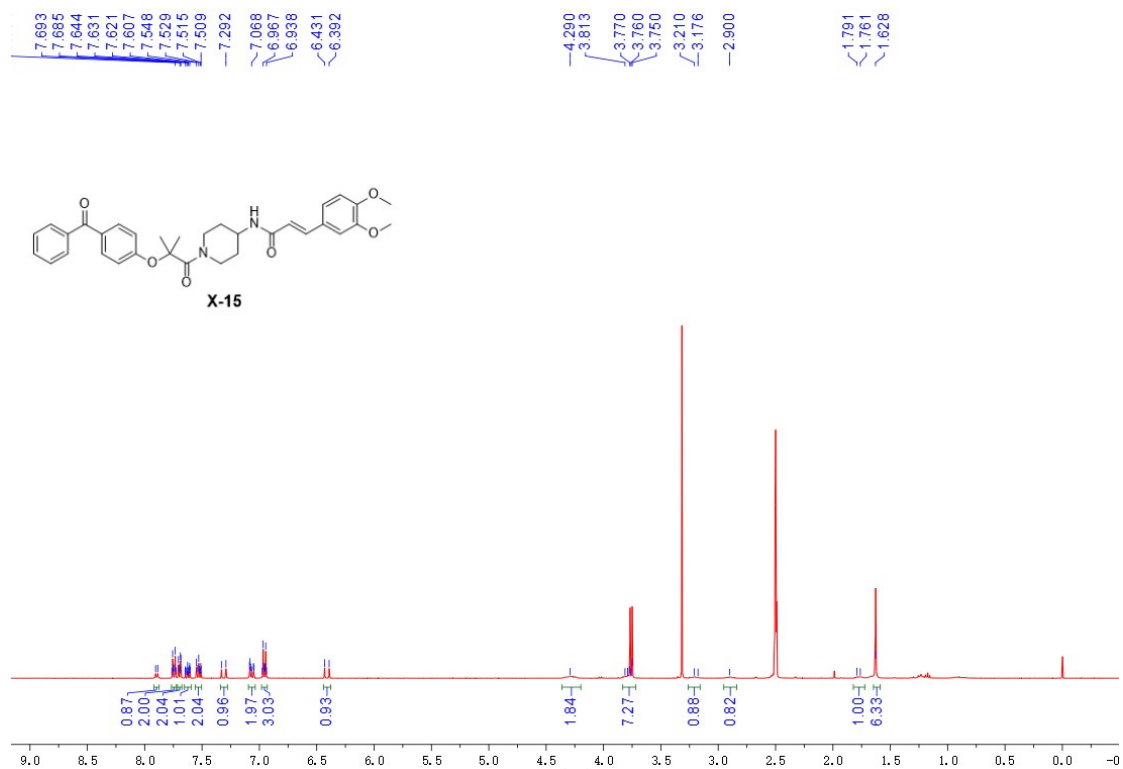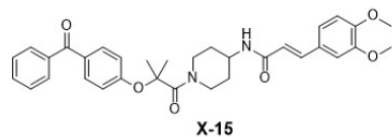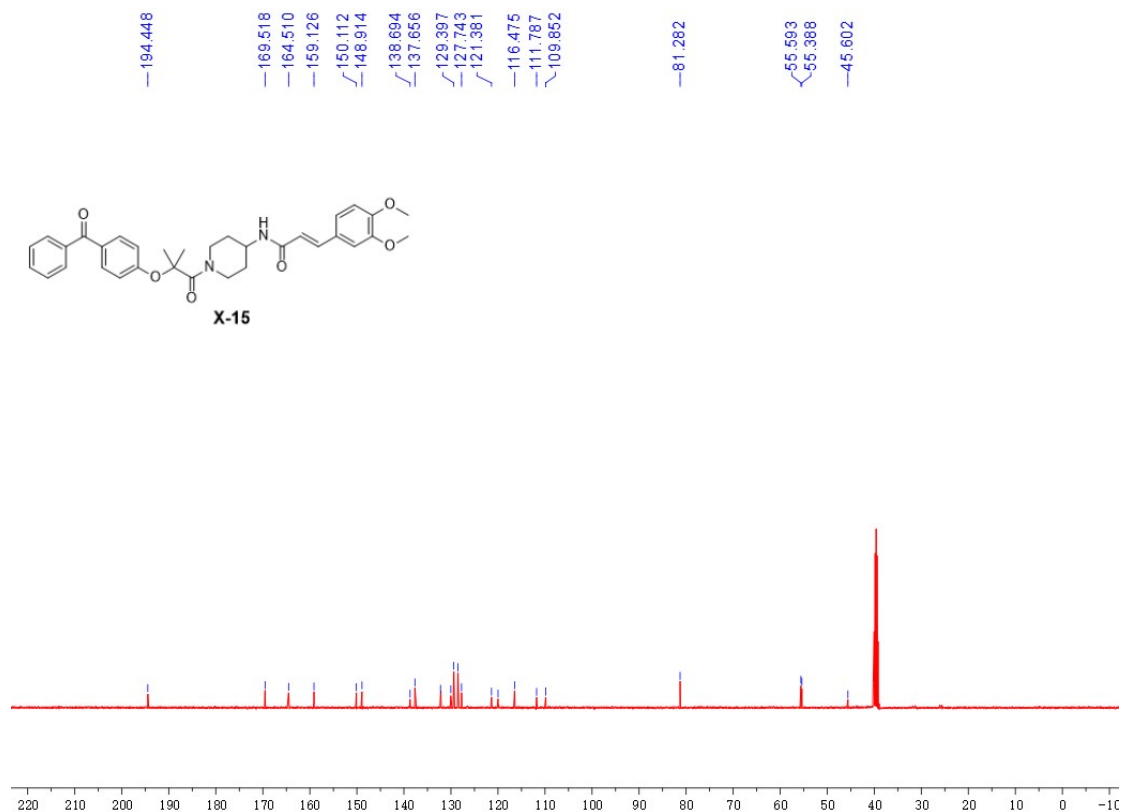

## HPLC purity traces for final compounds X-15

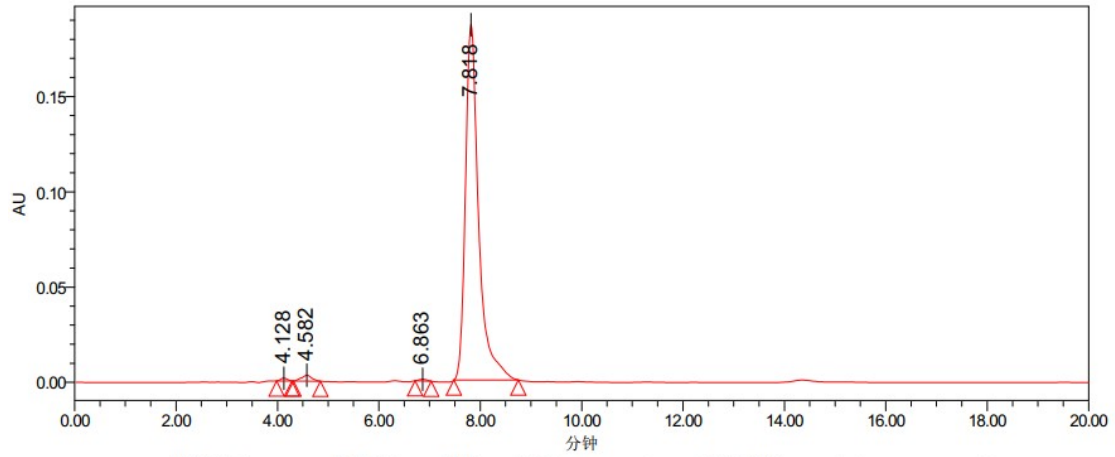

— 样品名称 41616; 样品瓶 15; 进样 1; 通道 W2489 ChA; 采集日期 2020/5/6 12:49:31 CST

处理通道: W2489 ChA 254nm

|   | 处理通道            | 保留时间<br>(分钟) | 面积      | % 面积  | 峰高     |
|---|-----------------|--------------|---------|-------|--------|
| 1 | W2489 ChA 254nm | 4.128        | 13440   | 0.39  | 1449   |
| 2 | W2489 ChA 254nm | 4.582        | 43693   | 1.27  | 3091   |
| 3 | W2489 ChA 254nm | 6.863        | 9927    | 0.29  | 917    |
| 4 | W2489 ChA 254nm | 7.818        | 3383155 | 98.06 | 186594 |

## $^1\text{H}$ NMR and $^{13}\text{C}$ NMR of final compounds X-16

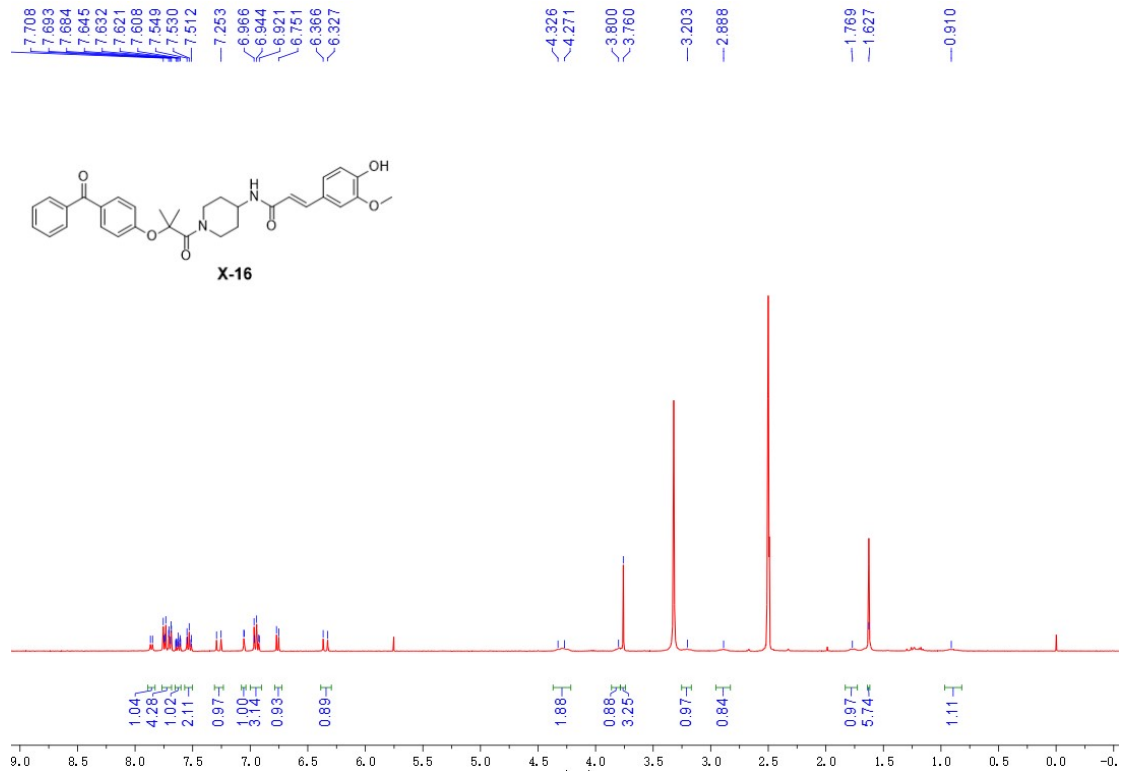



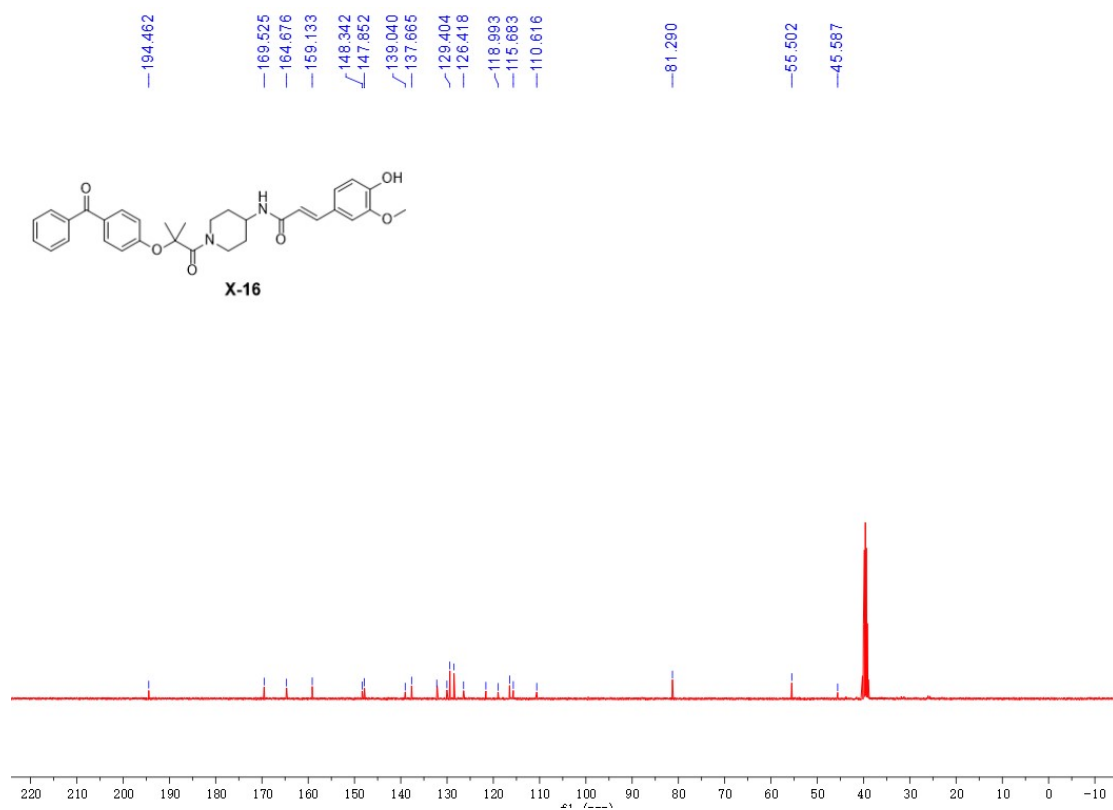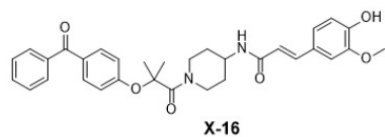

### HPLC purity traces for final compounds X-16

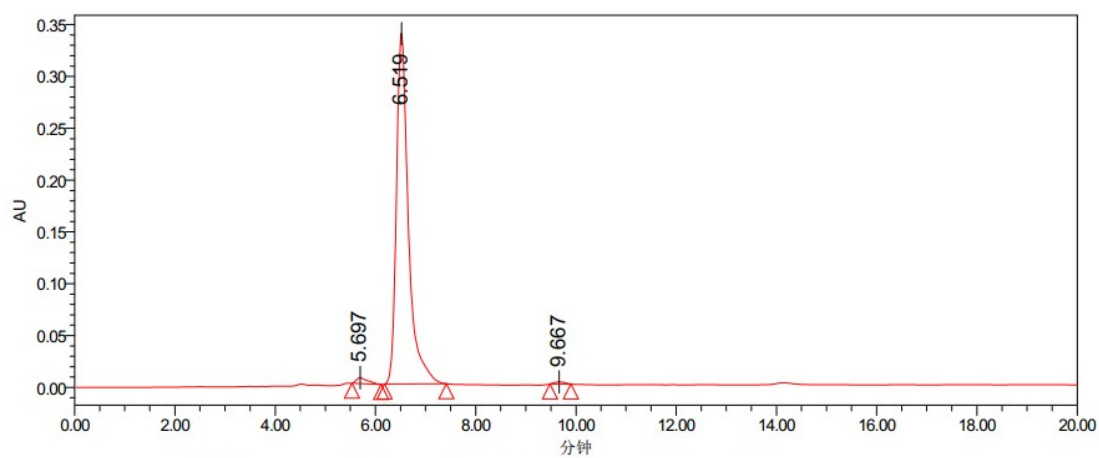

— 样品名称 41623; 样品瓶 3; 进样 1; 通道 W2489 ChA; 采集日期 2020/5/21 9:28:35 CST

处理通道: W2489 ChA 254nm

|   | 处理通道            | 保留时间 (分钟) | 面积      | % 面积  | 峰高     |
|---|-----------------|-----------|---------|-------|--------|
| 1 | W2489 ChA 254nm | 5.697     | 89229   | 1.55  | 5758   |
| 2 | W2489 ChA 254nm | 6.519     | 5634593 | 97.95 | 338539 |
| 3 | W2489 ChA 254nm | 9.667     | 28947   | 0.50  | 2029   |

$^1\text{H}$  NMR and  $^{13}\text{C}$  NMR of final compounds **X-17**

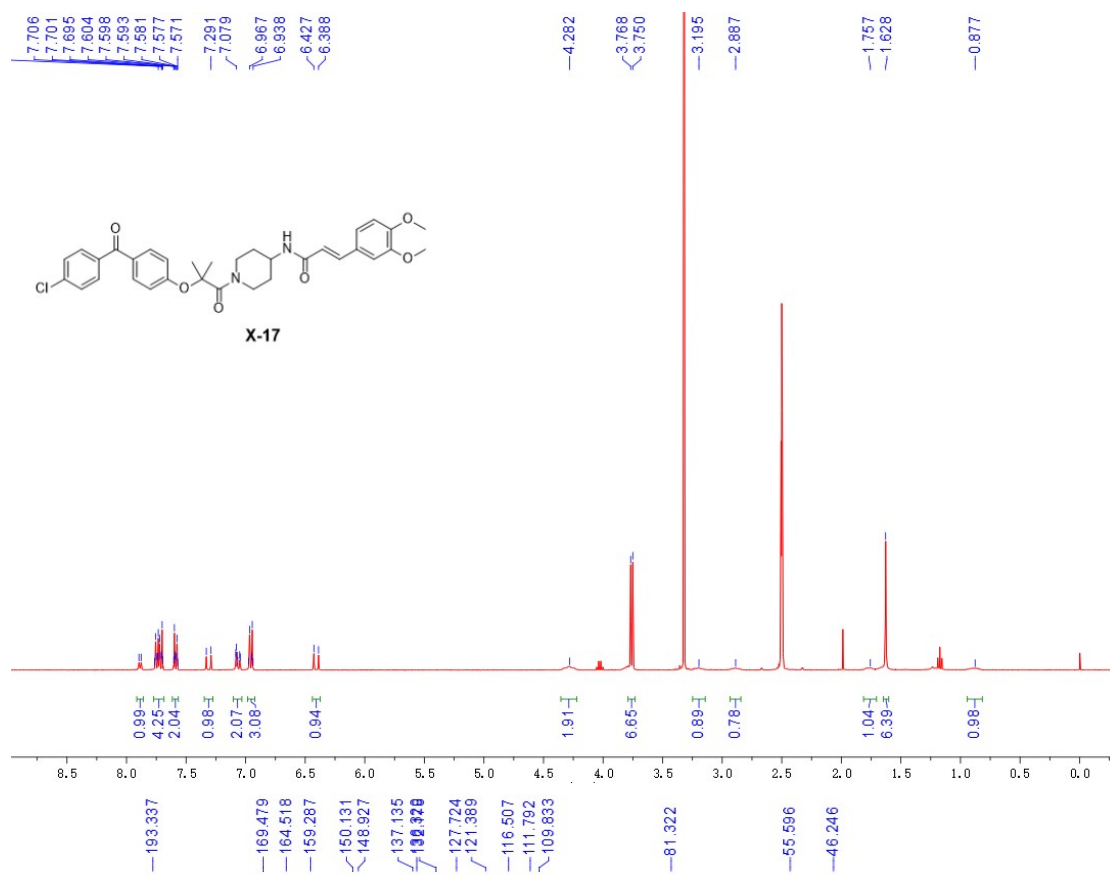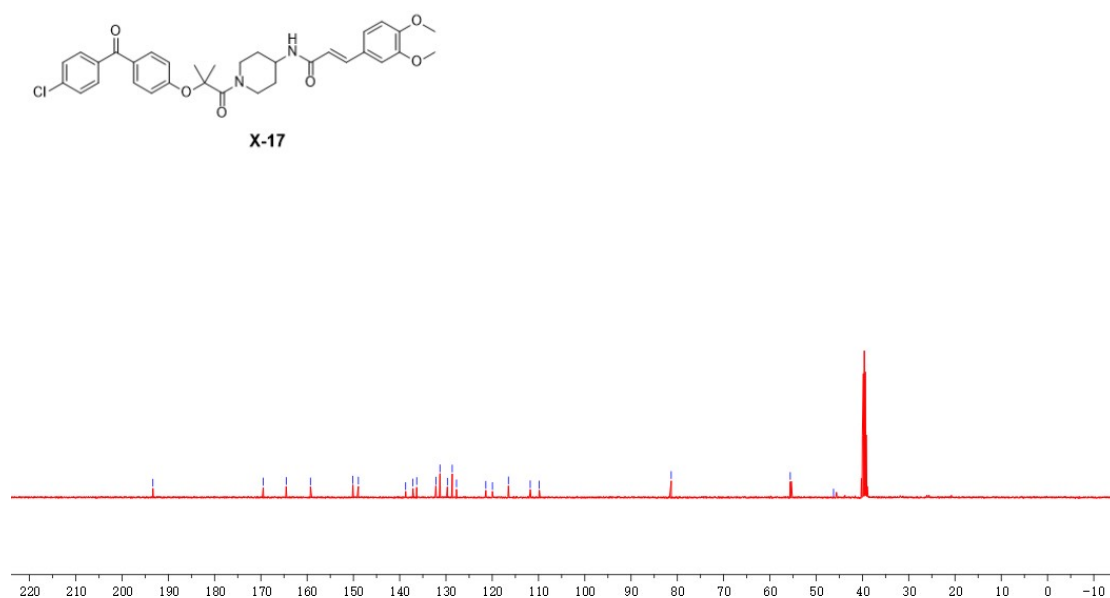

# HPLC purity traces for final compounds X-17

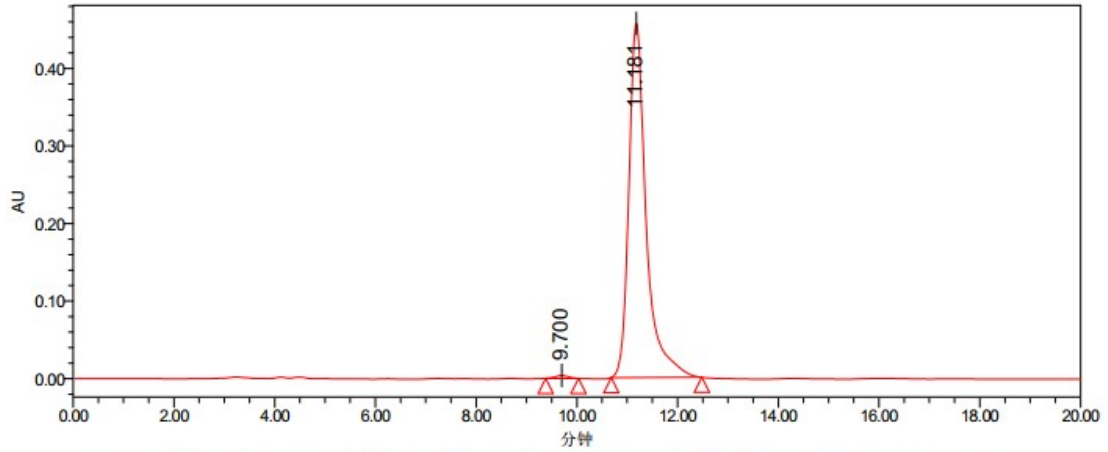

处理通道: W2489 ChA 254nm

|   | 处理通道            | 保留时间<br>(分钟) | 面积       | % 面积  | 峰高     |
|---|-----------------|--------------|----------|-------|--------|
| 1 | W2489 ChA 254nm | 9.700        | 65728    | 0.60  | 3664   |
| 2 | W2489 ChA 254nm | 11.181       | 10919170 | 99.40 | 457120 |
